**Title:**

**Repurposing cell growth-regulating compounds identifies kenpaullone which ameliorates pathologic pain via normalization of inhibitory neurotransmission**

**Authors:**

Michele Yeo<sup>1</sup>, Yong Chen<sup>1</sup>, Changyu Jiang<sup>2</sup>, Gang Chen<sup>2</sup>, Maria Lioudyno<sup>4</sup>, Qian Zeng<sup>1</sup>, Zilong Wang<sup>1,2</sup>, Jorge Busciglio<sup>4</sup>, Ru-Rong Ji<sup>2,3</sup>, Wolfgang Liedtke<sup>1,2,3,5,6,7</sup>

**Affiliations:**

Departments of Neurology<sup>1</sup>, Anesthesiology<sup>2</sup> and Neurobiology<sup>3</sup>, Duke University Medical Center, Durham NC

Department of Neurobiology, University of California at Irvine, Irvine CA<sup>4</sup>

Duke Neurology Clinics for Headache, Head-Pain and Trigeminal Sensory Disorders<sup>5</sup>

Duke Anesthesiology Clinics for Innovative Pain Therapy<sup>6</sup>

<sup>7</sup> lead contact & corresponding author: [wolfgang@neuro.duke.edu](mailto:wolfgang@neuro.duke.edu)

## Summary

Inhibitory GABA-ergic neurotransmission is of fundamental relevance for the adult vertebrate central nervous system and requires low chloride ion concentration in neurons. This basic ionic-homeostatic mechanism critically relies on expression and function of KCC2, a neuroprotective ionic transporter that extrudes neuronal chloride. Attenuated expression of KCC2 causes circuit malfunction in chronic pain and other neuropsychiatric illnesses. To find new analgesics, we screened 1057 cell growth-regulating compounds in cultured mouse primary cortical neurons for enhancement of *Kcc2* gene expression. We identified kenpauillone (KP), which enhanced *Kcc2/KCC2* expression and function in cultured rodent and human neurons by inhibiting GSK3 $\beta$ . KP effectively reduced pathologic pain in preclinical mouse models. In nerve-injury pain, KP restored *Kcc2* expression and GABA-evoked chloride reversal potential in the spinal cord dorsal horn. Delta-catenin, a phosphorylation-target of GSK3 $\beta$  in neurons, activated the *Kcc2* promoter via Kaiso transcription factor, and transient spinal transgenesis of delta-catenin mimicked KP's analgesic effects.

## Introduction

In the mature vertebrate central nervous system (CNS),  $\gamma$ -aminobutyric acid (GABA) acts primarily as an inhibitory neurotransmitter and is critical for normal CNS functioning (Fiumelli et al., 2005; Ganguly et al., 2001). In chronic pain and itch, GABA-ergic transmission is compromised, causing circuit malfunction and disrupting inhibitory networks (Braz et al., 2017; Braz et al., 2015; Coull et al., 2003; Delpire and Mount, 2002; Doyon et al., 2013; Gagnon et al., 2013; Kahle et al., 2014a; Koch et al., 2018; Kuner, 2010; Sommer, 2016). Therefore, we must discover new approaches for the restoration of physiologic GABA-ergic transmission. These innovations will increase our basic understanding of these sensory disorders and enable us to address the unmet medical need of chronic pain and itch, with safer and more effective alternatives to opioids for chronic pain.

In the adult vertebrate CNS, the  $K^+/Cl^-$  cotransporter KCC2 is expressed in neurons and continuously extrudes chloride ions, thus ensuring that intracellular levels of chloride ions remain low as required for inhibitory GABA-ergic neurotransmission (Agez et al., 2017; Cancedda et al., 2007; Fiumelli and Woodin, 2007; Kahle et al., 2013; Yeo et al., 2009; Yeo et al., 2013b; Zhu et al., 2008). In chronic pathologic pain, KCC2 expression is attenuated in the primary sensory gate in spinal cord dorsal horn neurons. This key pathophysiological mechanism contributes to an excitation/inhibition imbalance by corrupting inhibitory neurotransmission and causing inhibitory circuit malfunction (Braz et al., 2017; Dedek et al., 2019; Doyon et al., 2013; Ferrini et al., 2013; Kahle et al., 2014a; Li et al., 2016; Mapplebeck et al., 2019; Price et al., 2005). Notably, there is no 'back-up' protein that can rescue the KCC2 expression deficit. Thus, we reasoned that if we could boost *Kcc2* gene expression, we could normalize inhibitory transmission and achieve relief of chronic pain.

We therefore conducted an unbiased screen of cell growth-regulating compounds under the assumption that a sizable fraction of them function by interfering with epigenetic and transcriptional machinery. Since mature neurons do not divide, these compounds are attractive candidates to upregulate gene expression of *Kcc2* and thereby lower neuronal chloride levels. We identified such compounds by rigorous iterations of primary and secondary screening, and we selected one of them for in-depth exploration: kenpaullone (KP), a glycogen synthase kinase-3 (GSK3)/cyclin-dependent kinase (CDK) inhibitor (Schultz et al., 1999; Zaharevitz et al., 1999). KP functions as an analgesic and antipruritic in preclinical mouse models. Our data suggest that a cellular mechanism of action of KP in neurons is based on its GSK3 $\beta$ -inhibitory function which causes

increased *Kcc2* gene expression, which in turn relies on nuclear transfer of the neuronal catenin,  $\delta$ -catenin ( $\delta$ -cat) (Arikkath et al., 2009; Turner et al., 2015). In the nucleus, we found that  $\delta$ -cat enhances *Kcc2* gene expression via Kaiso transcription factors (Rodova et al., 2004). Increased *Kcc2* gene expression led to increased KCC2 chloride extrusion in neurons. We also documented *Kcc2* expression enhancement in the spinal cord dorsal horn (SCDH) of mice with nerve injury, including more negative, thus electrically more stable GABA-evoked chloride reversal potential.

## Results

### 1057 compound screen in primary cortical neurons for *Kcc2* gene expression enhancers

To identify *Kcc2* gene expression enhancing compounds, we cultured primary cortical neurons from *Kcc2*-luciferase(LUC)-knockin (*Kcc2*-LUCki) mice (Liedtke et al., 2013; Yeo et al., 2013a) and used LUC metrics as readout for activity of the proximal *Kcc2* promoter (2.5kB (Yeo et al., 2009)), which drives LUC in this mouse transgenic line. We obtained a Z' factor of 0.94. We remain aware that this strategy will not select for long-range enhancers of *Kcc2* gene expression that act outside the 2.5kB core *Kcc2* promoter. We screened 1057 compounds, contained in two NCI libraries (Suppl File S1, Fig. 1A), related to inhibition of growth of malignantly transformed cells. Iterative screening followed by measurements of *Kcc2* mRNA (RT-qPCR) and intracellular chloride ([Cl<sup>-</sup>]<sub>i</sub>), using clomeleon chloride indicator protein (Kuner and Augustine, 2000; Yeo et al., 2009), led to decreasing numbers of confirmed and re-confirmed hits, and we ended up with 4 “winner” compounds (Fig. 1A). Of these we identified kenpaullone (KP), a GSK3/CDK kinase inhibitor, as a promising compound for further study based on its previous record of neuroprotection in translationally relevant preclinical models (Liu et al., 2016; Reinhardt et al., 2019; Skardelly et al., 2011; Yang et al., 2013).

Our data establish that (i) KP enhances *Kcc2* gene expression in rat and mouse primary cortical neurons (Suppl. File 1; Fig. 1B), (ii) this effect is dose-dependent when tested in rat neurons (Fig. 1B), (iii) in rat neurons, KP lowers [Cl<sup>-</sup>]<sub>i</sub> (Fig. 1C), (iv) this effect relies on chloride-extruding function of KCC2 transporter protein (Fig. 1D), (v) KP does not function as an enhancer of KCC2 transporter-mediated chloride efflux (Suppl Fig. 1), (vi) in human primary cortical neurons, KP dose-dependently enhances *KCC2* gene expression (Fig.

1D), which is accompanied by increased KCC2 protein expression and increased expression of synaptophysin (Fig. 1E-F). This latter finding suggests increased synaptic maturation. These data indicate that our rationally designed screen identified a GSK3/CDK kinase inhibitor, KP, that enhances *Kcc2/KCC2* gene expression and not KCC2-mediated chloride extrusion in CNS neurons. KP functions as *Kcc2/KCC2* gene expression enhancer in mammals including humans, where we document enhanced synaptic maturation and increased KCC2 expression and function.

===== Fig. 1 =====

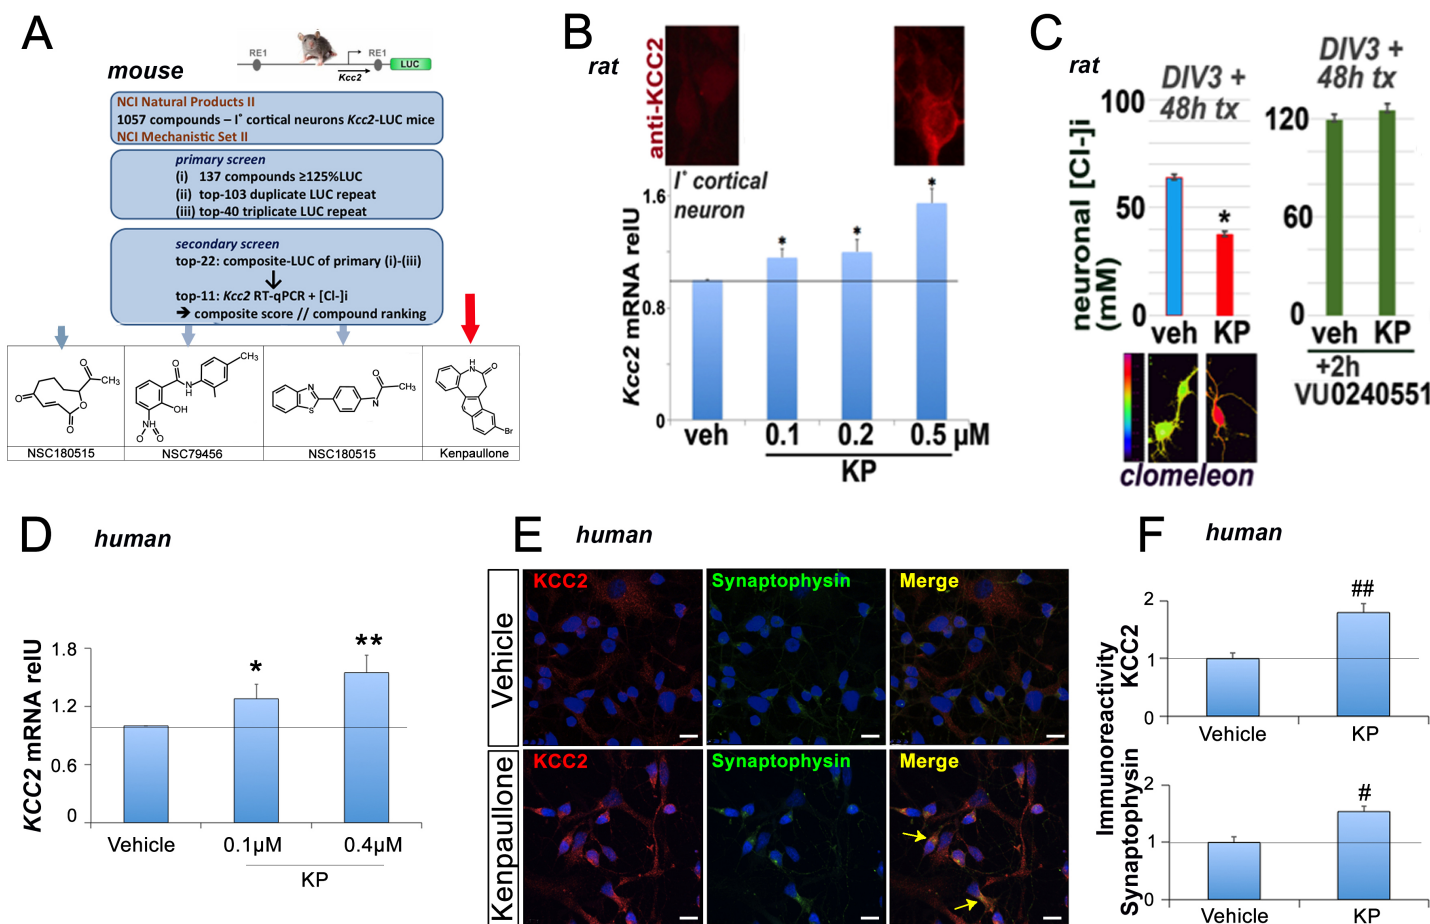

**Fig. 1. Compound screening for enhancers of *Kcc2* expression in primary cortical neurons yields Kenpaulлоне**

A, primary mouse neurons, B-C: primary rat neurons. D-F: primary human neurons.

**A)** Top panel: Screening paradigm using three rounds of primary screen based on luciferase (LUC) activity followed by secondary screen including *Kcc2* RT-qPCR and Clomeleon chloride imaging. Bottom panel: Four compound “winners” including Kenpaulлоне (KP). Screening conducted in primary mouse neurons.

**B)** Primary rat cortical neurons. Bar diagram: dose-dependent increase in *Kcc2* mRNA expression after KP treatment, also reflected by increased protein expression as shown by KCC2 immuno-label (micrographs). Results represent the average mRNA expression of 4 independent neuronal cultures.  $p < 0.05$ , one-way ANOVA

**C)** Primary rat cortical neurons. Neuronal [Cl<sup>-</sup>]<sub>i</sub>, measured with ratiometric chloride indicator, clomeleon, is robustly and significantly reduced after KP treatment. Note that add-on treatment with KCC2-transport

blocker, VU0240551, leads to a  $[Cl^-]_i \geq 120mM$ , for both, vehicle-treated and KP-treated, indicating that KP's chloride lowering effect relies on KCC2 chloride extruding transport function.  $n \geq 75$  neurons from 3 independent cultures; \*  $p < 0.01$ , t-test

**D)** Primary human cortical neurons. *KCC2* mRNA increases in a KP dose-dependent manner. Results represent the average mRNA expression of 4 independent neuronal cultures. \* $p = 0.05$ , \*\*  $p = 0.01$ , one-way ANOVA

**E)** Primary human cortical neurons. Representative confocal images at DIV10 immuno-labelled for KCC2 and synaptic maturation-marker, synaptophysin, after vehicle or KP-treatment. Bar,  $10\mu m$ .

**F)** Primary human cortical neurons. Morphometry of immuno-cytochemistry shows increased KCC2 (62%) and synaptophysin (54%) expression after KP treatment, relative to vehicle.  $n = 27-28$  neurons analyzed for KCC2 ## $p = 0.0002$ ;  $n = 17-18$  neurons analyzed for synaptophysin, # $p = 0.001$ , t-test.

=====  
===== Fig. 1=====

### **KP exhibits analgesic and antipruritic activities in-vivo**

In view of this discovery, we decided to address in-vivo analgesic effects of KP.

We found that KP showed analgesic effects in two preclinical mouse models of pathologic pain: nerve injury-induced neuropathic pain, implemented by peripheral nerve constriction (Fig. 2), and inflammatory pain, induced by peripheral tissue injection of complete Freund's adjuvans (CFA) (Suppl Fig. 2). Nerve injury- and CFA-induced behavioral sensitization (e.g., decrease in withdrawal thresholds in response to mechanical cues) were significantly reduced by KP treatment. For neuropathic pain, these effects of KP were dose-dependent, namely less accentuated at the lower dose of 10 mg/kg daily intraperitoneal (i.p) injections, and more pronounced at 30 mg/kg (Fig. 2A). Importantly, we observed protracted analgesia, e.g. an almost complete elimination of sensitization after nerve constriction on d7-14. This finding can be interpreted as re-programming of sensitized nociception, and is rather not suggestive of selective analgesic inhibition of a pro-algesic ion channel or receptor. Thus, in vivo, KP functions as an analgesic when administered systemically in injury-related pain models.

We then asked whether the analgesic effects of KP were mediated centrally at the spinal cord level. We injected KP intrathecally (i.t; 30  $\mu g$ ) and observed reduced mechanical allodynia in mice with nerve constriction injury (Fig 2B). We then co-applied KP with the KCC2 chloride transport inhibitor VU0240551 and observed an elimination of the i.t analgesic effects of KP (Fig. 2C), which suggests that the central analgesic effect of KP depends on KCC2-mediated chloride extrusion.

=====  
 ===== Fig. 2 =====  
 =====

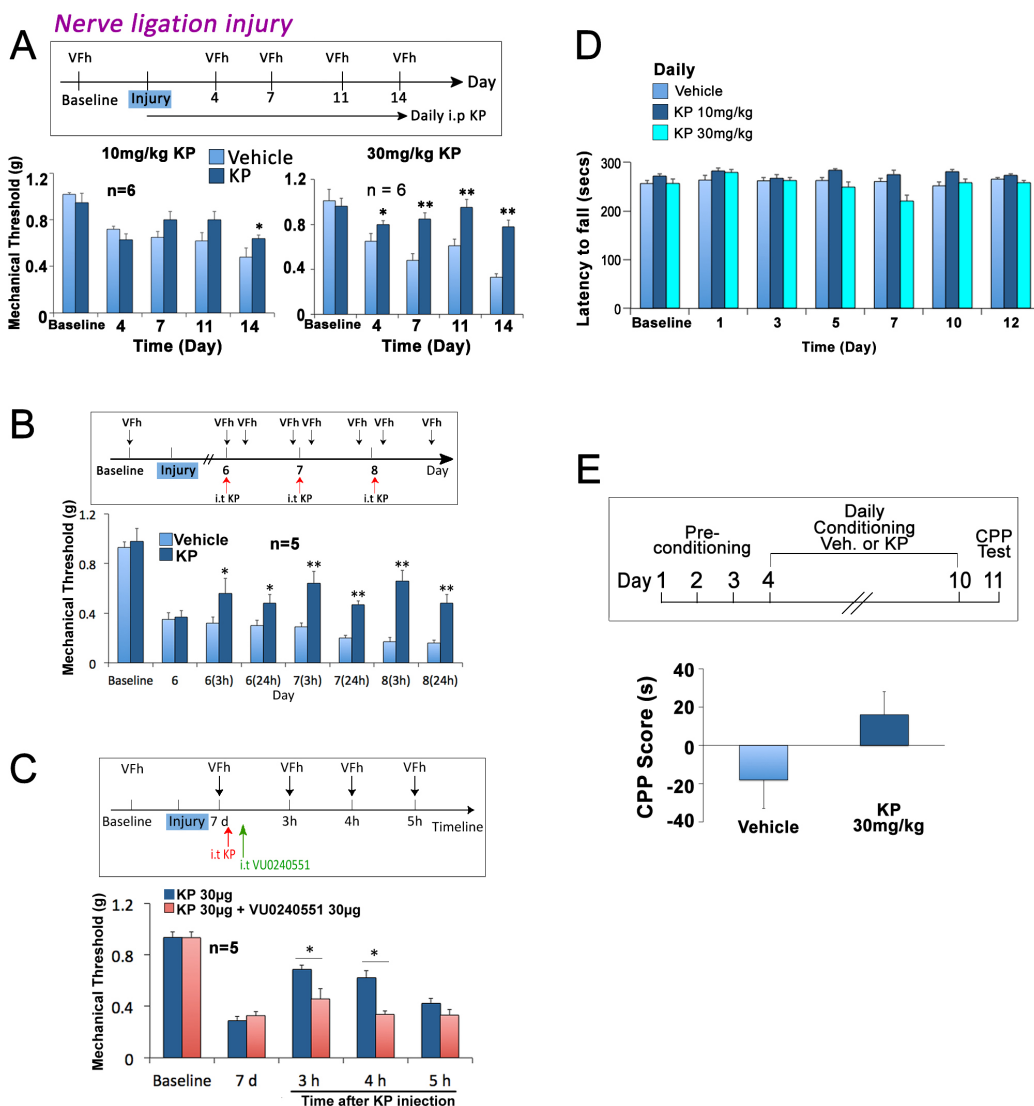

**Fig. 2. Kenpaullone is analgesic in mouse nerve injury pain**

**A)** Systemic KP is analgesic for nerve injury pain. Top: Overview of timeline of systemic injection and behavioral metrics. Mice were injected intraperitoneally (i.p.) with either 10mg/kg or 30mg/kg KP daily after nerve constriction injury. Bar diagram: Analgesic effects of KP for sensitized mechanical withdrawal were dose-dependent, namely less accentuated at 10 mg/kg and more pronounced at 30 mg/kg. \* $p < 0.05$ , \*\* $p < 0.01$ , one-way ANOVA

**B)** Intrathecal (i.t) KP is analgesic for nerve injury pain. Top: Overview of timeline of i.t injection and behavioral metrics. Bar diagram: analgesic effects of KP for sensitized mechanical withdrawal were observed upon daily i.t injection, note increasing sensitization in vehicle injected controls. Withdrawal behavior was measured at two times after i.t injection, +3h, +24h. \* $p < 0.05$ , \*\* $p < 0.01$ , one-way ANOVA

**C)** i.t co-application of KP and specific KCC2 transport inhibitor compound, VU0240551, eliminates the central analgesic effects of KP. Behavior assays were conducted at 3h, 4h and 5 h on day 7 after i.t injection. \* $p < 0.05$ , \*\* $p < 0.01$ , one-way ANOVA

**D)** Effect of KP on motor function and coordination of mice – rotarod assay. Bar diagram showing the mean of elapsed time on the rotarod. KP does not affect motor stamina and coordination in mice, with the one-time exception of high-dose KP on day 7.  $n = 3-4$  mice per group.

**E)** KP does not evoke conditioned place preference (CPP). Timeline for CPP assay shown on top. Bottom: No significant difference in CPP scores between KP and vehicle (t-test,  $p > 0.05$ ,  $n = 5$  mice per group).

=====  
 ===== Fig. 2 =====  
 =====

Based on these findings, we also were curious about KP's anti-pruritic effects because inhibitory transmission in the SCDH plays an important role in chronic pruritus (Akiyama et al., 2015; Bourane et al., 2015; Braz et al., 2017; Braz et al., 2014; Koch et al., 2018; Mishra and Hoon, 2015). In a 2,4-dinitrofluorobenzene (DNFB) chronic contact dermatitis model (Zhang et al., 2015), daily i.p injections of KP (30 mg/kg) significantly reduced robust scratching behavior of sensitized sites (Suppl Fig. 2).

With these beneficial effects of KP on pathologic pain and itch, we next addressed whether it had undesirable effects on the CNS in terms of sedation, impairment of motor stamina, balance and coordination. Rotarod testing (Heyser et al., 2013) of KP-treated mice (10, 30 mg/kg; i.p.) revealed that KP does not induce unwanted side effects (Fig. 2D). We also tested whether KP (30 mg/kg; i.p.) can trigger brain reward mechanisms by assessing conditioned place preference (Jackson et al., 2019; Sora et al., 1998), and there were no such effects (Fig. 2E). Thus, KP functions as an analgesic and antipruritic in preclinical mouse models and does not cause unwanted side effects including reward mechanisms, sedation, lack of coordination, and reduced stamina. In pathologic pain models, KP acts centrally to mediate analgesic effects, and this relies on KCC2 chloride extrusion.

### **KP renormalizes EGABA in spinal cord dorsal horn by increasing *Kcc2* expression and function**

With the aforementioned findings and in view of the SCDH as the likely site of analgesic action of KP (Coull et al., 2003; Gagnon et al., 2013), we focused on SCDH *Kcc2* expression and function in nerve injury and response to KP. We found that in the SCDH, KP repaired attenuated *Kcc2* expression caused by nerve injury, at both the mRNA and protein levels (Fig. 3A). To measure *Kcc2* mRNA, we microdissected SCDH Rexed-layers I-II with laser capture followed by RT-qPCR. SCDH KCC2 protein expression was measured morphometrically after KCC2 immunolabeling using SCDH laminae I-II as the region-of-interest (Fig. 3B).

We next determined whether repair of attenuated *Kcc2* expression was associated with re-normalization of chloride reversal potential after application of GABA (EGABA). Prior to interrogation of spinal cord slice preparations at 72h post-injury, we demonstrated robust mechanical allodynia of young mice by peripheral nerve constriction injury and its almost complete behavioral reversal by systemic treatment with KP at 30 mg/kg (Fig. 3C). Next, in spinal cord slice preparations derived from these animals, SCDH lamina-II neurons were investigated by perforated patch-clamp (Fig. 3D, Suppl Fig 3). Our data reveal that the greatly more



positive, more excitable EGABA reversal potential in nerve-injury mice was renormalized toward negative, more stable values in KP-treated animals (Fig. 3D). Our documentation of re-normalization of EGABA in SCDH lamina-II neurons is consistent with repair of *Kcc2* expression in SCDH in KP-treated mice. Thus, in a nerve injury model, the central analgesic action of KP relies on the enhanced gene expression of *Kcc2* and re-normalization of EGABA in pain-relaying neurons in the superficial spinal cord.

===== Fig. 3=====

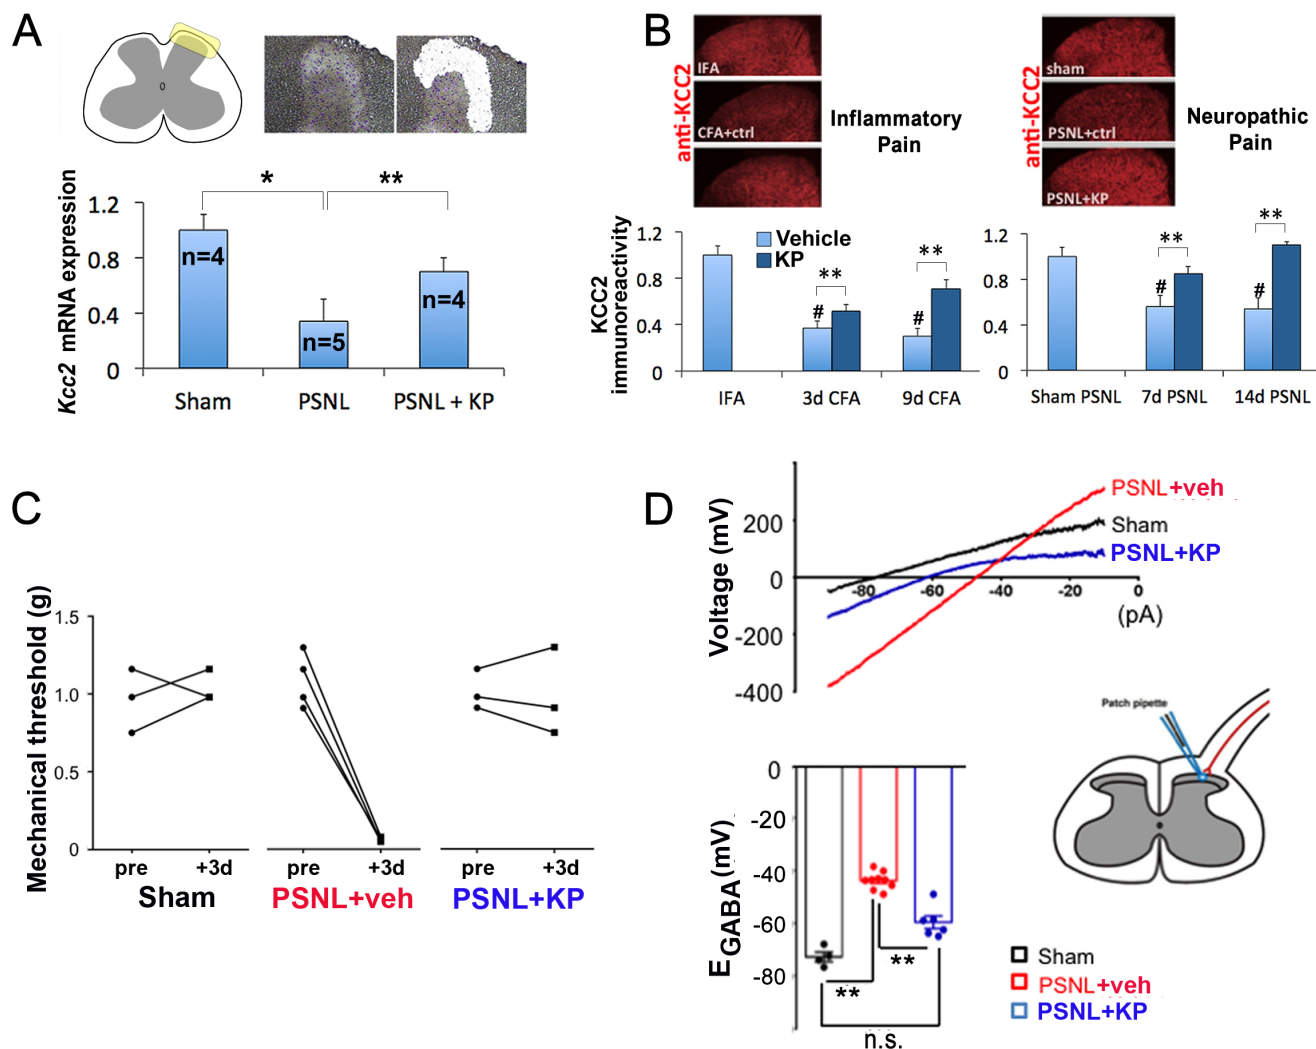

**Fig. 3. Kenpaullone re-normalizes  $E_{GABA}$  in spinal cord dorsal horn by increasing *Kcc2* expression/function.**

**A)** Top left: Lamina-I/II area of spinal cord dorsal horn (SCDH) is highlighted. Top right: image representation of lamina-I/II area before and after laser capture microdissection. Bottom, bar diagrams: KP (10mg/kg) rescues significantly attenuated *Kcc2* mRNA expression in the SCDH after nerve constriction injury vs vehicle treated mice. \*  $p < 0.05$ ; \*\*  $p < 0.01$ , one-way ANOVA

**B)** Top panels: representative KCC2 immuno-staining of the SCDH in nerve constriction injury and CFA-mediated inflammatory injury. Bottom, bar diagram: KP (10mg/kg) increases KCC2 protein expression in SCDH compared to vehicle control in nerve constriction injury and inflammatory pain models.  $n = 5$  mice/group, #  $p < 0.01$  vs IFA or sham PSNL; \*\* $p < 0.01$  KP vs vehicle; one-way ANOVA.

**C)** Potent behavioral sensitization of juvenile mice after peripheral nerve constriction injury (PSNL) and its almost complete behavioral recovery after treatment with KP (30 mg/kg). n=3 mice sham n=4 mice PSNL + vehicle, n= 3 mice PSNL + KP. Note accentuated responses for sensitization and rescue in younger mice vs adult mice (compare with Fig 2A).

**D)** SCDH slices were isolated from the same juvenile mice as shown in panel C), and lamina-II neurons were examined for  $E_{GABA}$  using the perforated patch method, illustrated by the schematic, 2-3 neurons per mouse. The top panel shows a representative  $I-V$  plot. Bottom, bar diagram shows quantification of  $E_{GABA}$  indicating a significant depolarizing shift in sham vs PSNL with vehicle treatment. Note significant hyperpolarization in response to KP treatment in PSNL mice. Of note, PSNL plus KP was not different from sham injury.  $**p<0.05$ , one-way ANOVA

===== Fig. 3=====

### **Cellular mechanism of action in neurons: GSK3 $\beta$ → $\delta$ -cat→Kaiso→Kcc2**

The aforementioned findings set up a compelling rationale to deconstruct the cellular mechanism of action of KP that accounts for its effects in SCDH neurons and thus its sensory effects. We conducted these studies in primary cortical neurons because 1) these cells were used for our initial screen, 2) there is rodent-human similarity in terms of the effects of KP on *Kcc2/KCC2* gene expression, and 3) the effects of KP on *Kcc2* gene expression and KCC2 chloride transporter function in these neurons were similar to our findings in SCDH lamina-II neurons, which cannot be cultured as readily for mechanistic cellular studies.

First we addressed the question whether KP inhibiting GSK3 $\beta$  or CDK is responsible for increasing expression of *Kcc2*. Using a set of GSK3 inhibitors different from KP, we demonstrated increased expression of *Kcc2* (Fig. 4A). In contrast, a suite of CDK-inhibitory compounds did not increase (but decreased) expression of *Kcc2* (Fig. 4B)

We then utilized a drug affinity responsive target stability (DARTS) assay (Lomenick et al., 2009) to document binding of KP to GSK3 $\beta$  (Fig. 4C, Suppl. File S2), a finding consistent with previous reports in cell lines (Knockaert et al., 2002) yet novel in primary cultured neurons. Of note, other known kinase targets of KP such as CDKs were not identified in our unbiased DARTS assay. This strengthens our assertion that KP functions as an inhibitor of GSK3 $\beta$  in primary neurons. We next sought to identify kinase targets of GSK3 $\beta$  that are differentially phosphorylated in response to KP. Using unbiased phosphoproteomics assays in rat primary cortical neurons, we identified the neuronal catenin,  $\delta$ -catenin (CTNND2;  $\delta$ -cat) (Bareiss et al., 2010; Kosik et al., 2005). We saw that the serine at position 239 was one site at which differential phosphorylation occurred short-term (1h) and persisted long-term (24h) in response to KP (Fig. 4D, Suppl File S3). The respective residue in human  $\delta$ -cat is S276.  $\beta$ -catenin ( $\beta$ -cat) could also be a GSK3 $\beta$  kinase target, yet  $\beta$ -cat

was not significantly differentially phosphorylated.  $\delta$ -cat(S276) is found in phosphosite.org and has been previously described (Herskowitz et al., 2010), but finding it in primary neurons is novel. Catenin phosphorylation is known to facilitate intracellular degradation via ubiquitination (Oh et al., 2009; Orford et al., 1997). In order to examine whether non-phosphorylated  $\delta$ -cat preferentially traffics to the nuclei of neurons, we used confocal scanning microscopy after specific  $\delta$ -cat immunolabeling. Our results indicate that KP treatment of primary neurons enhanced  $\delta$ -cat nuclear transfer (Fig. 4E). Given the known binding of  $\beta$ -cat/ $\delta$ -cat, we conducted the experiment with labeling for  $\beta$ -cat and obtained a similar result (Suppl Fig 4). To investigate the relevance of S276 in  $\delta$ -cat, we used the N2a neural cell line because these cells transfect at higher efficiency than primary cortical neurons. N2a cells expressed neuronal  $\beta_{III}$ -tubulin and showed elongated processes, and, similar to primary cortical neurons, they exhibited increased *Kcc2* expression (Fig. 4F) and reduced [Cl<sup>-</sup>]<sub>i</sub> in response to KP. In N2a cells, which show signs of neuronal differentiation, nuclear transfer of  $\delta$ -cat was found enhanced by treatment with KP (Fig. 4F). To study the role of S276 in  $\delta$ -cat we then transfected differentiated N2a cells with  $\delta$ -cat(S276A), which resulted in enhanced nuclear transfer of  $\delta$ -cat(S276A); KP had no effect. Thus,  $\delta$ -cat(S259/S276) (rat/human) is very likely a relevant phosphorylation site and GSK3 $\beta$  kinase target in neurons. Inhibition of GSK3 $\beta$  or rendering S276 phosphorylation-resistant enhances nuclear transfer of  $\delta$ -cat, also of its binding partner  $\beta$ -cat. Accordingly, a selective catenin inhibitor attenuated *Kcc2* gene expression in a dose-dependent manner (Suppl Fig 4). We conclude that catenins enhance *Kcc2* gene expression in neurons and we subsequently explored their effects on the *Kcc2* promoter.

===== Fig. 4=====

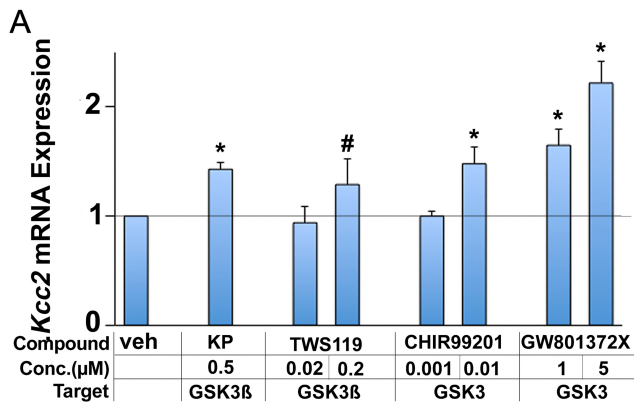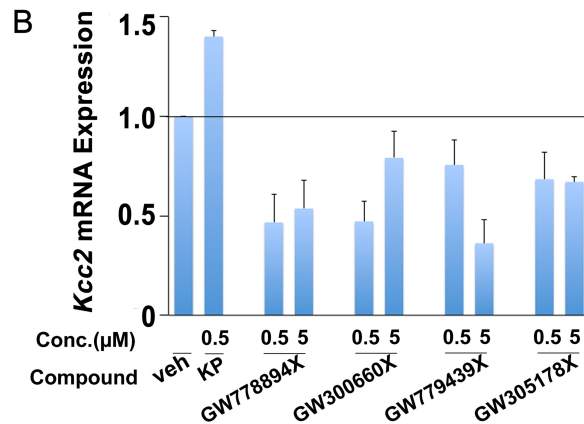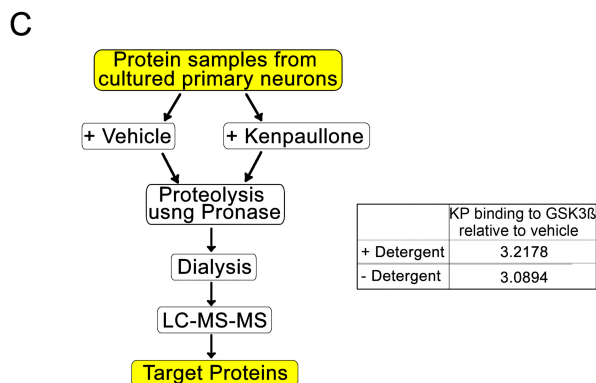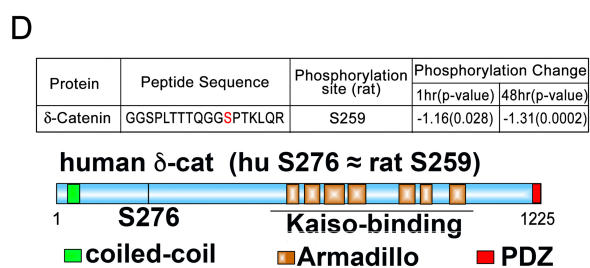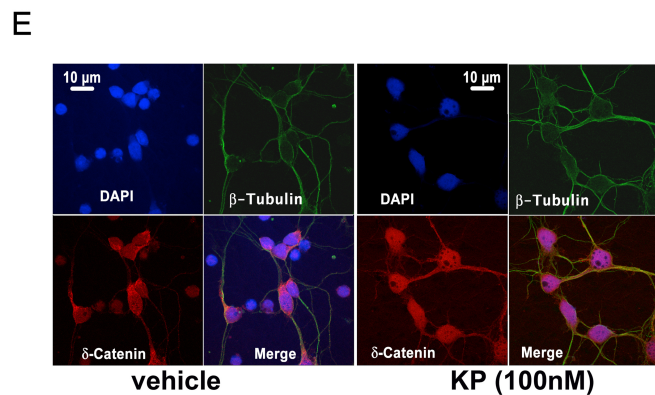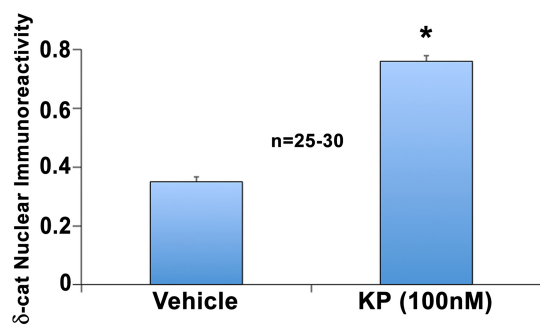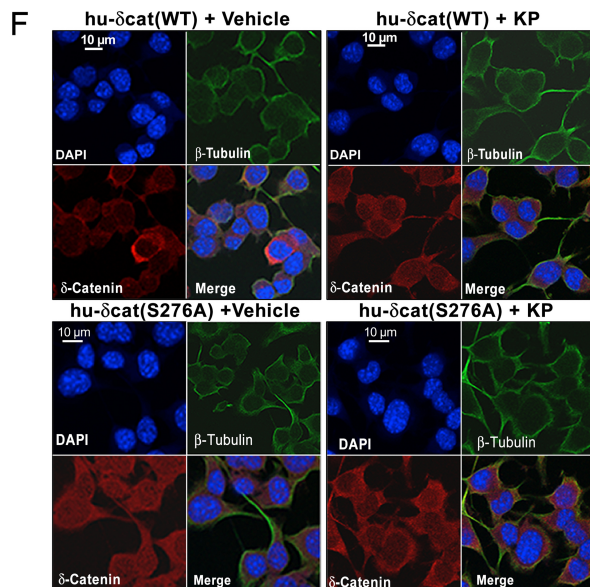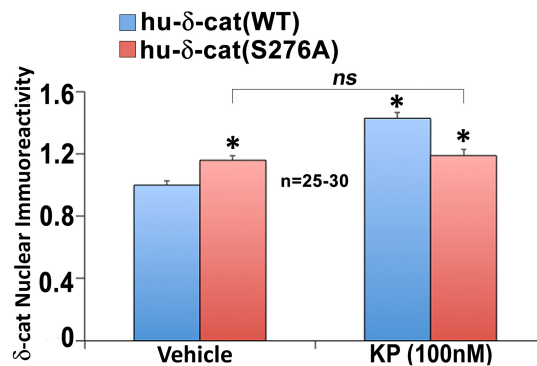

#### Fig. 4. Cellular mechanism of action of Kenpaullone in central neurons

**A)** Pan-GSK3 inhibitors and GSK3 $\beta$ -selective inhibitors increase *Kcc2* mRNA expression, measured by RT-qPCR, in a dose-dependent manner, rat primary cortical neurons. Results represent the average mRNA expression of 4 independent neuronal cultures. #p<0.05, \*p<0.01, compound vs vehicle, one-way ANOVA.

**B)** Several CDK-inhibitory compounds do not increase *Kcc2* mRNA expression, rat primary cortical neurons, 4 independent neuronal cultures.

**C)** Left panel: DARTS methodology to identify proteins that bind to KP in rat primary cortical neurons. Right panel: KP binding to GSK3 $\beta$  is independent of detergent treatment of the protein sample preparation from the neuronal culture. Of note, binding to GSK3 $\beta$  was documented whereas binding to CDKs was not (see Suppl dataset File S2 DARTS).

**D)** Top panel: Phosphoproteomics assays reveal S259 phosphorylation target in  $\delta$ -cat protein after KP treatment of rat primary cortical neurons, significant de-phosphorylation resulted after 1h treatment and was sustained at 24h (see Suppl dataset phosphoproteomics). Bottom: schematic representation of structure of human  $\delta$ -cat (CTNND2) showing functional domains. Human residue S276 matches rat S259. The Armadillo domain region plays a key role in transcription factor Kaiso binding to  $\delta$ -cat.

**E)** Top panel: Representative immuno-labeling of  $\beta_{III}$ -tubulin (neuronal isoform of  $\beta$ -tubulin) and  $\delta$ -cat before and after KP treatment in rat primary cortical neurons, DAPI counterstain for nuclei. Bottom: KP significantly increases  $\delta$ -cat nuclear translocation. \*p<0.001 KP vs vehicle, t-test.

**F)** Top panel: Representative immuno-labeling of  $\beta_{III}$ -tubulin and  $\delta$ -cat before and after KP treatment in differentiated N2a mouse neural cells which were transfected with either hu- $\delta$ -cat(WT), hu- $\delta$ -cat(S276A) or control vector. Bottom Panel: KP significantly enhances nuclear transfer of  $\delta$ -cat when transfected with  $\delta$ -cat(WT). Mutation  $\delta$ -cat(S276A) increases nuclear transfer, but treatment with KP had no effect. \*p < 0.05 vs vehicle, one-way ANOVA.

===== Fig. 4=====

We identified two Kaiso binding sites (potential sites for  $\delta$ -cat) in the *Kcc2* proximal promoter using computational methods (Aerts et al., 2005). Two Kaiso binding sites bracket the transcriptional start site (TSS) of the *Kcc2* transcript (Fig. 5A). In rat primary cortical neurons,  $\delta$ -cat was bound to these Kaiso sites in the *Kcc2* promoter, as expected from previous reports (Fig. 5A) (Dai et al., 2011; Rodova et al., 2004). Interestingly, treatment with KP inhibited the binding of  $\delta$ -cat to the upstream site. Binding of  $\delta$ -cat to the site 3' to the TSS was enhanced, suggesting that the upstream site functions as repressor and the 3' site as an enhancer. In rat primary cortical neurons,  $\beta$ -cat bound to a TCF DNA-binding site close to the 5' RE-1 site within the *Kcc2* promoter (Suppl Fig 5), as expected from previous reports (Sakamoto et al., 2000), and treatment of cells with KP enhanced this interaction.

We then built promoter constructs with rationally-targeted deletions to interrogate the effects of the Kaiso- and TCF-binding sites on activity of the *Kcc2* promoter and to determine if this activity was regulated by KP. For ease of transfection, key to this method, we used N2a neural permanent cells and cultured them to neuronal phenotype. The 5' and 3'  $\delta$ -cat Kaiso binding sites functioned in repressive and enhancing manners, respectively (Fig. 5B). Presence of one site was sufficient to elicit enhanced activity of the *Kcc2* promoter upon treatment with KP, and the deletion of both Kaiso sites led to markedly reduced promoter activity and

non-responsiveness of the construct to KP. The deletion of the TCF (T-cell factor) binding-site from the *Kcc2* promoter did not change *Kcc2* promoter activity or its response to KP treatment (Suppl Fig. 5), but the triple deletion of both Kaiso sites and the TCF site rendered the construct minimally active and completely non-responsive to KP. These data suggest that  $\delta$ -cat, a kinase target of GSK3 $\beta$  in CNS neurons as verified by our phosphoproteomics data, traffics to the nucleus increasingly upon GSK3 $\beta$  inhibition. At the genomic level,  $\delta$ -cat interacts with the *Kcc2* promoter to enhance *Kcc2* expression via two Kaiso DNA-binding sites.  $\beta$ -cat, a known binding partner of  $\delta$ -cat (Consortium, 2019), is not a significant neuronal GSK3 $\beta$  kinase target (Suppl File S3), but appears to play an ancillary role in enhancement of *Kcc2* gene expression.

===== Fig. 5=====

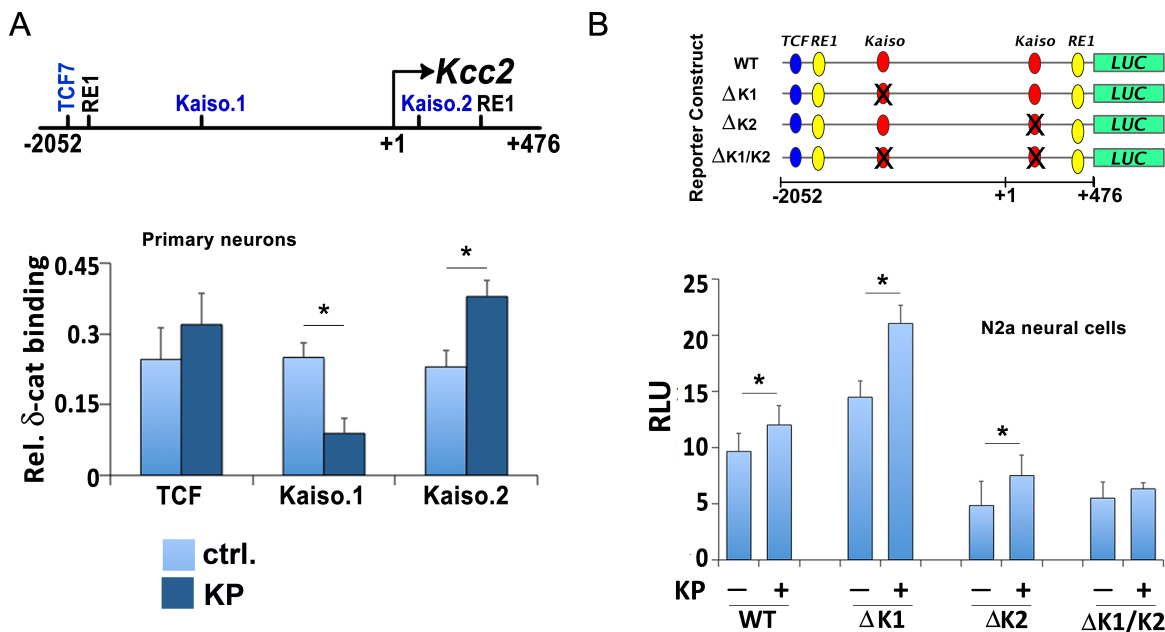

**Fig. 5. Kenpaullone regulates *Kcc2* promoter activity via  $\delta$ -cat and two Kaiso sites.**

**A)** Structure of mouse *Kcc2* gene encompassing 2.5kb surrounding the transcription start site (TSS; +1). Location of DNA binding sites: Kaiso1 (-1456 to -1449), Kaiso2 (+83 to +90) and TCF (-1845 to -1838) relative to TSS, all three sites can bind  $\delta$ -cat via Kaiso (Kaiso1, 2 sites) and  $\beta$ -cat (TCF). Bottom, bar diagram: Chromatin immuno-precipitation (ChIP) using anti- $\delta$ -cat antibody in rat primary cortical neurons reveals binding of  $\delta$ -cat to all three sites. KP treatment significantly increases binding of  $\delta$ -cat to the *Kcc2* promoter on the Kaiso2 binding site, significantly reduced binding to Kaiso1, and non-significant increase at TCF. n=4 independent neuronal cultures were subjected to ChIP; \*p<0.01 KP-treatment vs vehicle, t-test.

**B)** Top panel: mouse *Kcc2* promoter constructs, Kaiso1, -2 were deleted and a  $\Delta\Delta$  construct was built devoid of both sites. Dual-RE1 sites and TCF site shown for orientation, also TSS at +1. Bottom, bar diagram: Luciferase (LUC) activity of *Kcc2* promoter constructs in N2a cells with neuronal differentiation. Kaiso1 binding site functioned in a repressive manner, Kaiso2 in an enhancing manner, both sites regulated by KP. Presence of either site was sufficient to evoke enhanced activity of the *Kcc2* promoter in response to KP. Deleting both Kaiso sites ( $\Delta K1/K2$  construct) led to markedly reduced promoter activity and non-responsiveness to KP. n=4 independent cultures were subjected to transfection with the engineered constructs; \*p<0.01 KP-treatment vs vehicle, t-test.

===== Fig. 5=====

## **$\delta$ -cat spinal transgenesis is analgesic in nerve constriction injury**

We hypothesized that  $\delta$ -cat, when expressed as a spinal transgene in sensory relay neurons, will function as an analgesic in nerve constriction injury. We first documented that a  $\delta$ -cat transgene increases *Kcc2* expression in N2a neural cells, and that *Kcc2* levels were slightly elevated when using  $\delta$ -cat(S276A) (Fig. 6A). Thus, human  $\delta$ -cat transgenes mimic the effects of KP in a mouse neural cell line.

We then constructed AAV9 vectors harboring human  $\delta$ -cat and  $\delta$ -cat(S276A), driven by the minimal human neuronal synapsin promoter (Liu et al., 2008). We built synapsin-tdTomato as the control vector and injected  $5 \times 10^9$  viral genomes (5  $\mu$ L; i.t) of each construct. Assessment of tdTomato fluorescence 3d post injection revealed spinal transgenesis that was evenly manifesting in the SCDH (Fig 6B). We measured mechanical withdrawal thresholds after nerve constriction injury and found significant improvement of sensitization for both  $\delta$ -cat constructs with sustained benefit over two weeks (Fig. 6B).  $\delta$ -cat(S276A) showed increased effect vs.  $\delta$ -cat(WT) on d14. In accordance with behavioral findings, *Kcc2* mRNA in microdissected SCDH was significantly increased in  $\delta$ -cat(S276A) (Fig 6C). For  $\delta$ -cat(WT), *Kcc2* mRNA abundance was elevated but not to significant levels likely because of viral transduction of only a fraction of sensory relay neurons in the SCDH. KCC2 protein, as measured by immunolabeling and morphometry in SCDH layers-I/II, was significantly increased in animals injected with  $\delta$ -cat viral vectors (Fig. 6D). Thus,  $\delta$ -cat spinal transgenesis via AAV9 (adeno-associated virus serotype 9) is sufficient to evoke analgesia after nerve constriction injury. Importantly,  $\delta$ -cat spinal transgenesis is also accompanied by increased expression of *Kcc2* in the SCDH. This finding suggests that our proposed  $\delta$ -cat cellular mechanism of KP in neurons, directly downstream of GSK3 $\beta$  inhibition, sufficiently explains the analgesic effects following nerve constriction injury. Moreover, our discovery points toward a genetically-encoded approach that can be developed for translation into clinical use as an alternative or complement to KP-related small molecules.

=====  
===== Fig. 6 =====

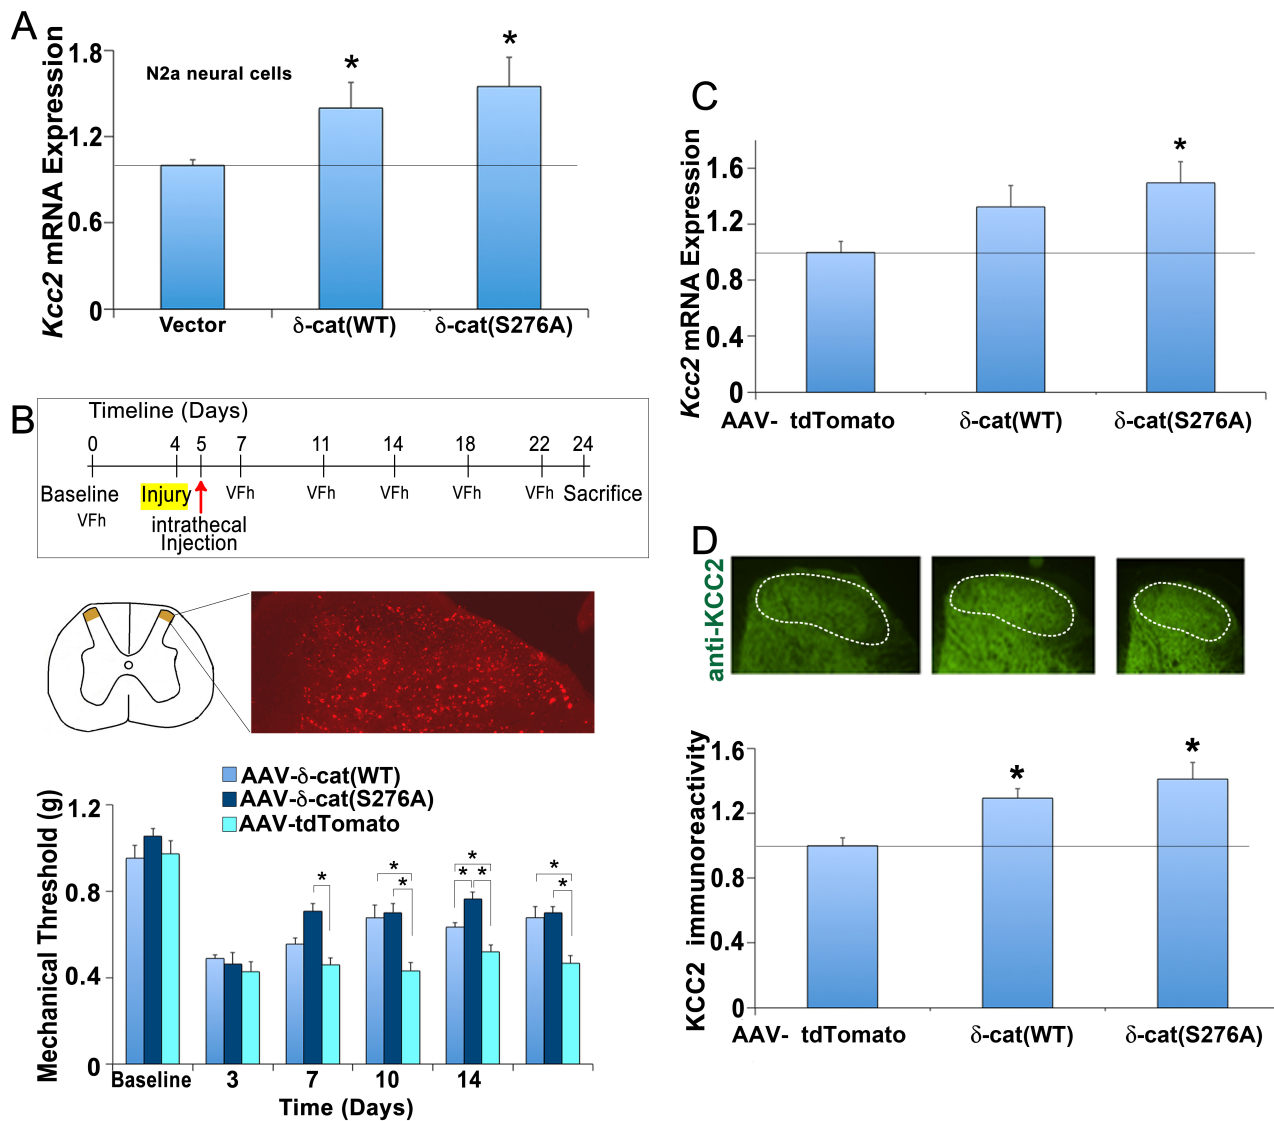

**Fig. 6.  $\delta$ -cat spinal transgenesis is analgesic in nerve constriction injury.**

**A)**  $\delta$ -cat(WT) transgene significantly increases *Kcc2* mRNA expression in differentiated N2a cells, and expression level was slightly elevated when transfecting  $\delta$ -cat(S276A), both significantly increased over WT. n=4 independent cultures were subjected to transfection with the  $\delta$ -cat constructs; \*p<0.01  $\delta$ -cat construct vs control transfection, one-way ANOVA.

**B)** Top, schematic: Timeline for behavioral testing after constriction nerve injury and subsequent i.t injection of AAV9 transgenesis vectors. Middle panel: SCDH showing lamina-I/II (left) and td-Tomato expression in SCDH neurons 3d post-i.t injection of AAV-tdTomato. Bottom, bar diagrams: Mechanical withdrawal thresholds after nerve constriction injury. Significant improvement of sensitization for both  $\delta$ -cat(WT) and  $\delta$ -cat(S276A) constructs with sustained benefit over 2 weeks. Note slightly more potent analgesia by  $\delta$ -cat(S276A) based on the data on d7, d14. \*p<0.05 one-way ANOVA

**C)** *Kcc2* mRNA in microdissected SCDH was significantly increased in  $\delta$ -cat(S276A) as assessed by RT-qPCR. For  $\delta$ -cat(WT), *Kcc2* abundance was elevated but not to significant levels likely because of viral transduction of only a fraction of sensory relay neurons in the SCDH. n as in panel B, \* p<0.05  $\delta$ -cat construct vs control transfection, one-way ANOVA.

**D)** KCC2 protein, as measured by immunolabeling and morphometry in SCDH layers-I/II was significantly increased in  $\delta$ -cat(WT) and  $\delta$ -cat(S276A) spinal transgenesis animals. n as in panel B, \* p<0.05  $\delta$ -cat construct vs control transfection, one-way ANOVA.

=====  
 ===== Fig. 6=====





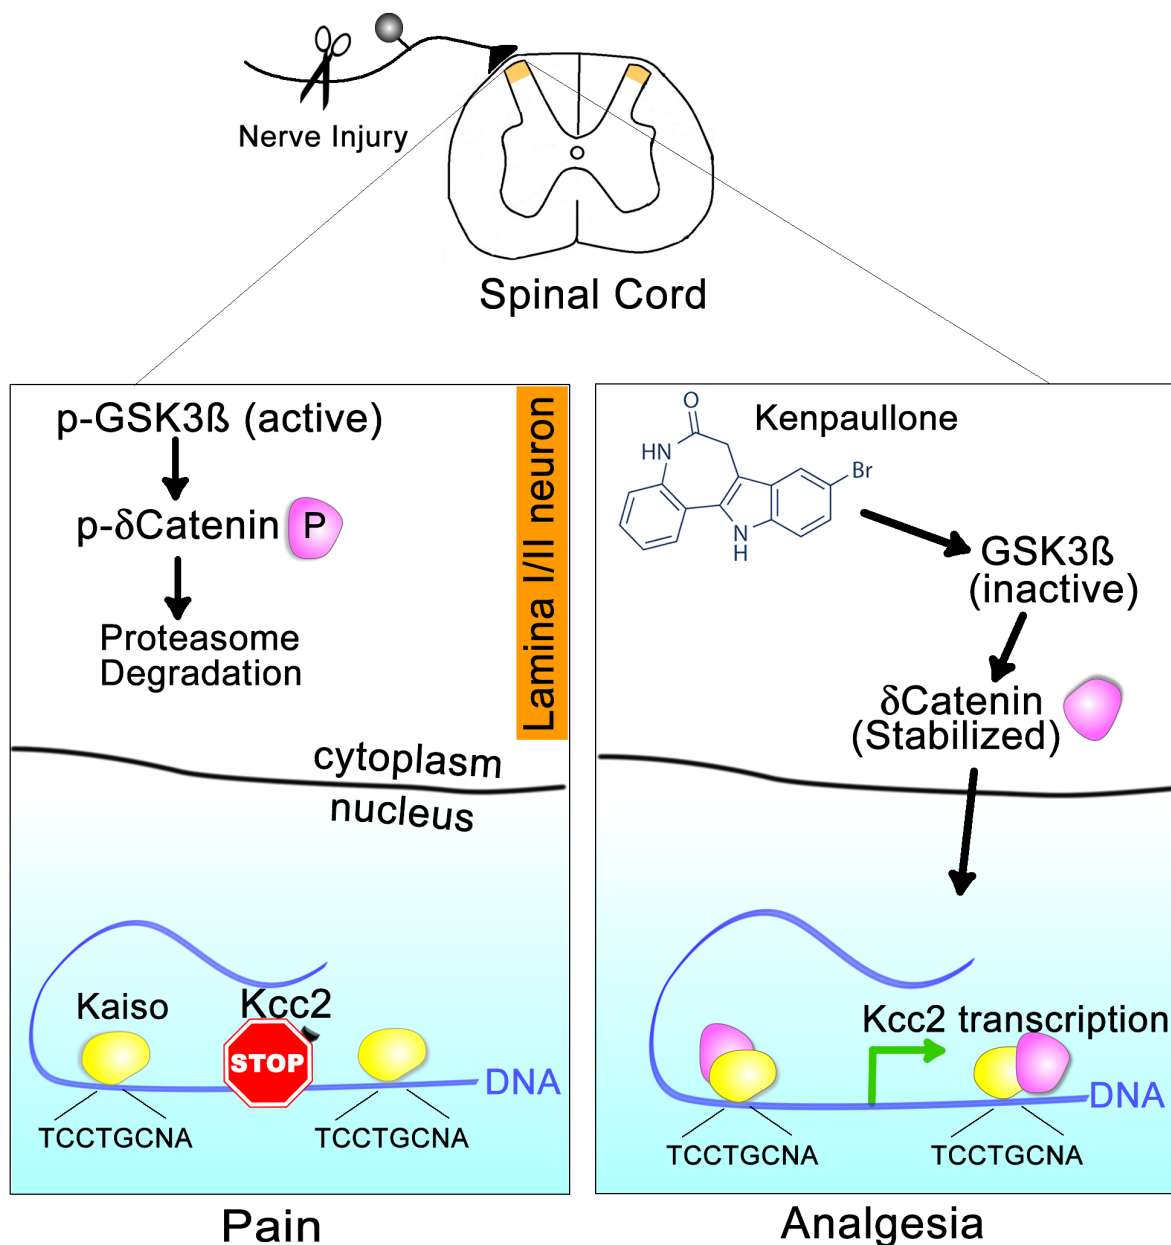

**Fig. 7. Analgesic mechanism of action of Kenpauillone**

Left panel: Nerve injury facilitates activation of GSK3 $\beta$  kinase in pain relay neurons in layer-II of the SCDH. GSK3 $\beta$  phosphorylates  $\delta$ -cat in the cytoplasm at S259/S276. Phospho- $\delta$ -cat is unstable, undergoes ubiquitination and subsequent degradation. In the nucleus, Kaiso recruits repressive transcription factors on the *Kcc2* gene promoter which leads to overall repressed *Kcc2* transcription.

Right panel: Treatment with KP inactivates GSK3 $\beta$  in SCDH layer-II pain relay neurons. In turn, this leads to de-phosphorylation and stabilization of  $\delta$ -cat which enters the nucleus. In the nucleus,  $\delta$ -cat binds to Kaiso transcription factor complex and displaces repressive transcription factors. This leads to a net enhancement of *Kcc2* expression.

===== Fig. 7=====

We identified compounds from two NCI libraries that can interfere with gene regulation in CNS neurons. We projected that a substantial number of the molecules contained in these libraries can regulate growth of rapidly dividing cells by interfering with chromatin and via additional epigenetic mechanisms. Therefore, these

compounds can act similarly in non-dividing CNS neurons such as primary developing cortical neurons. These neurons enabled us to identify compounds that can activate the *Kcc2* promoter, and we selected KP as the “winner” compound for in-depth exploration. Though KP is predicted to have multiple targets in CNS neurons, we provide evidence that KP binds to neuronal GSK3 $\beta$  and not to CDKs. In addition, it is known that KP inhibits GSK3 $\beta$  with highest potency from amongst known targets (Knockaert et al., 2002; Kunick et al., 2004; Schultz et al., 1999). We also present evidence that GSK3 $\beta$  inhibition by KP directly upregulates *Kcc2* gene expression via the  $\delta$ -catenin-Kaiso pathway. This mechanism of a GSK3-inhibitory compound has not been reported previously. Of note, this novel concept held true in primary human neurons in which KP also enhanced synaptic maturation. We remain aware that KP can inhibit other kinases, but our data suggest that inhibition of GSK3 $\beta$  and subsequent enhancement of *Kcc2* gene expression via  $\delta$ -catenin are very important, perhaps dominant mechanisms of action of KP as it attenuates pathologic pain. Additionally,  $\delta$ -cat-Kaiso likely affects multiple neuronal genes, but our data suggest that enhanced *Kcc2* gene expression and KCC2 function are the major analgesic effector mechanisms of KP. Another argument, mechanistically weaker but translationally relevant, is the absence of unwanted effects of our *Kcc2* expression-enhancing strategy on choice behavior, motor stamina, and coordination. Effective targeting of multiple pathways would likely impact these behaviors. However, the behavioral profile for KP was similarly benign as other KCC2 expression-enhancing compounds (Gagnon et al., 2013).

Our screening strategy allows us to address a fundamental problem of pathological pain. This vastly unmet medical need, rooted in its chronicity, is driven by genetic reprogramming, which results in a maladaptive phenotype (Bai et al., 2015; Doyon et al., 2013; Kuner, 2010; Liang et al., 2015; Sommer, 2016). A key event is attenuated expression of *Kcc2* because of its relevance for inhibitory transmission in pain-relevant neural circuits (Coull et al., 2003; Gagnon et al., 2013; Kahle et al., 2014a; Li et al., 2016; Mapplebeck et al., 2019; Price et al., 2005). This has also been postulated in other pathologic conditions of the CNS as a general pathogenic feature (Hwang and Zukin, 2018; Lardenoije et al., 2015). Regulation of *Kcc2* gene expression by GSK3 $\beta$  and its kinase target  $\delta$ -cat is a novel insight of our study. This concept will permit rational exploration of links between GSK3 $\beta$   $\rightarrow$   $\delta$ -cat and attenuated *Kcc2*/*KCC2* gene expression and the resulting malfunction of inhibitory neurotransmission in several other relevant neurologic and psychiatric conditions such as

Alzheimer's Disease and other neurodegenerative diseases, psychoses, traumatic brain/spinal cord injury, Rett Syndrome, Autism Spectrum Disorders, and epilepsy (Boulenguez et al., 2010; Chen et al., 2018; Ferando et al., 2016; Freund and Meskenaite, 1992; Huberfeld et al., 2007; Hyde et al., 2011; Kahle et al., 2014b; Tang et al., 2016; Tao et al., 2012). We selected KP because of its previously reported neuroprotective properties for spinal motoneurons, brainstem auditory relay neurons, and hypoxia-injured hippocampal neurons (Liu et al., 2016; Reinhardt et al., 2019; Skardelly et al., 2011; Teitz et al., 2018; Winkelmann et al., 2015; Yang et al., 2013). It is possible there was a unifying mechanism of *Kcc2* expression enhancement by KP in these previous studies. Neuroprotective properties for a novel analgesic are welcome because chronic pain is associated with non-resolving neural injury mediated by neuroinflammation (Ji et al., 2018). Repurposing a GSK3 $\beta$ -inhibitory compound as an analgesic reprogramming compound that upregulates *Kcc2* expression links chronic pathologic pain to neurodegeneration at both the basic science and translational neuroscience levels.

Our work characterizes a novel strategy to treat chronic pathologic pain and also increases our basic understanding of pain and sensory transduction. With a focus on the enhanced expression of *Kcc2* in neurons as an analgesic strategy, we utilize a compound as a genomic reprogramming agent that reverts the expression of a key dysregulated gene. This puts us in position to address a key mechanism that underlies neural malplasticity in chronic pain: the loss of effective inhibitory neurotransmission in pain-relevant neural circuits by genomic dysregulation (Bai et al., 2015; Liang et al., 2015; Sommer, 2016), such as the lack of expression of *Kcc2* (Coull et al., 2003; Gagnon et al., 2013; Kahle et al., 2014a; Li et al., 2016; Mapplebeck et al., 2019; Price et al., 2005). Of practical/translational importance, we demonstrated that KP is non-sedative and does not affect motor stamina, coordination, or choice behavior. Furthermore, we target validated KP in human primary neurons. In aggregate, we identified a repurposed compound, KP, and a genetically-encoded cellular signaling pathway, GSK3 $\beta$ → $\delta$ -cat→Kaiso→*Kcc2*, which were not previously known to up-regulate *Kcc2*. Both of these *Kcc2*-enhancing approaches can be developed translationally into clinical neuroscience applications.

Our finding that KP acts as an anti-pruritic in a chronic contact dermatitis model is novel and suggests that defective expression of *Kcc2* in the SCDH may play an important role in chronic inflammatory itch. This finding

requires additional research to further elucidate the underlying cellular and neural circuit mechanisms. Validation in additional itch models will also facilitate translation to the clinic.

Our approach as described here for targeting of pain and itch is innovative. In the context of regulating neuronal chloride in the SCDH for analgesia, the previous discovery of small molecules that enhance KCC2 chloride extrusion is noteworthy (Gagnon et al., 2013). This study brought full circle the initial, earlier observation of lack of expression of KCC2 in SCDH neurons after injury (Coull et al., 2003). Together, the previous studies demonstrate causality of KCC2 downregulation in pathologic pain. Interestingly, recent results suggested that this mechanism also might apply to human spinal pathophysiology in pathologic pain (Dedek et al., 2019).

In an elegant and very recently published study, small molecules were selected to enhance expression of *Kcc2/KCC2* for effective rescue of a modeled Rett Syndrome phenotype (Tang et al., 2019).

It is our view that enhanced *Kcc2* gene expression, based on KP treatment or  $\delta$ -cat transgenesis as presented here, will complement direct enhancement of KCC2 chloride extrusion in targeting pathologic pain. Complementary use will help overcome recalcitrant lack of expression and function of KCC2 in pain relay neurons, as might be expected in clinical cases of “refractory” chronic pain. Clinical combination use of KCC2 expression enhancers with analgesic compounds that have different mechanisms of action will be advantageous as renormalized inhibitory transmission will likely cause improved effectiveness of other compounds, such as gabapentinoids.

## **Acknowledgements**

Invaluable comments on the manuscript were provided by Duke University colleagues Drs James McNamara, Albert La Spada, Nicole Calakos, Rochelle Schwartz-Bloom and Sidney Simon.

Viral vectors were expertly packaged by the Duke Neurotransgenesis Viral Vector Core, lead-scientist Dr Boris Kantor. Phospho-proteomics and DARTS analysis were conducted with the expert help of the Duke Proteomics Core Facility, Director Dr M. Arthur Mosely and lead-scientist Dr Erik Soderblom.

**Funding:** This work was supported by NIH grants to WL (NS066307), RRJ (DE11794), YC (DE022793), also by Duke University Department of Neurology-internal funds to WL.

**Author contributions:** conducted experiments – MY, YC, CYJ, GC, ML, QZ, ZLW, WL; conceptual input – MY, YC, JB, RRJ, WL; wrote paper – MY, YC, CJ, GC, ML, JB, RRJ, WL

**Competing interests:** There are no competing interests with this manuscript.

**Data and materials availability:** All data associated with this study are available in the main text or the supplementary materials.

## Methods

### Screening in primary cortical neurons from *Kcc2*-LUC transgenic mice, rat primary cortical neurons

Transgenic mice that express red-shifted luciferase (LUC) under the control of the *Kcc2* promoter (-2052/+476, described in (Yeo et al., 2009)), inserted into the Rosa26 locus, were previously described by us (Liedtke et al., 2013; Yeo et al., 2013a). We generated primary cortical neuronal cultures from newborn (p0) mice of this line (Liedtke et al., 2013; Yeo et al., 2013a).

After one week in culture, neurons were treated with compounds at 100 nM for 48h; LUC activity was determined for each compound with vehicle and trichostatin-A as negative and positive controls (Yeo et al., 2009). Experimental flow is depicted in Fig. 1A.

Rat primary cortical neuronal cultures were maintained as in (Yeo et al., 2009).

### Compound libraries

NCI compound libraries Natural Products II and Mechanistic Diversity Set II were obtained from NCI.

1057 compounds are listed in Supplemental Table 1. See also:

[https://ntp.niehs.nih.gov/organization/dscb/obtaining/available\\_plates.htm](https://ntp.niehs.nih.gov/organization/dscb/obtaining/available_plates.htm)

### Human neuronal cultures

The neuron-enriched cultures were established from male and female human fetal cortical specimens at 15 – 20 weeks of gestation. The protocols for tissue processing complied with all federal and institutional guidelines. Human cortical neural cultures were set up and maintained according to (Pelsman et al., 2003; Yeo et al., 2013a). At DIV6, cultures were exposed to KP (50, 100, 400 nM) for 48h and then harvested for isolation of RNA. For immunostaining, the experiment was repeated in independent cultures using 400 nM KP. Cells were fixed with 4% paraformaldehyde and processed for immunolabeling for KCC2, neuronal synaptic marker, synaptophysin, and neuronal nuclear differentiation marker (NeuN), and then inspected and image-captured on a fluorescent confocal microscope (Zeiss LSM700).

### $\delta$ -catenin DNA constructs, transgenesis vectors

Human  $\delta$ 2-catenin isoforms ( $\delta$ -cat, WT, and S276A point mutation) were cloned into pAAV-hSyn, tdTomato was used as control. AAV9 particles were packaged (Duke Viral Vector Core Lab). For i.t injections, a dilution of  $10^{12}$  viral genomes/mL was used.

### **Kcc2 promoter luciferase reporter assays**

After identifying TCF and Kaiso binding sites within the *Kcc2b* regulatory region (position -2052 bp to +476 bp relative to transcriptional start site (TSS)), these specific sites were deleted by PCR-based cloning. Following previous methods (Yeo et al., 2009), the WT promoter and the respective engineered mutant promoters were cloned into pGL4.17 to drive LUC. N2a cells were transfected with these constructs, co-transfected with Renilla LUC for normalization, and assayed for dual-LUC activity 24h after transfection. Mutant promoters were compared to WT, and the response to KP (400 nM) by the respective promoter was measured.

### **Chemicals**

Kenpaullone compound was synthesized by the Duke Small Molecule Synthesis Facility to >98% purity, verified by LC/MS. CLP257, ICG-001, TWS119, CHIR99201, and VU0240551 were obtained from Tocris. GW801372X, GW778894X, GW300660X, GW779439X, and GW305178X were supplied by the Structural Genomics Consortium (SGC) at UNC-Chapel Hill.

### **Animals**

C57bl/6J male mice (10-12 weeks old) were obtained from The Jackson Lab (Bar Harbor, ME). *Kcc2*-LUC mice were generated by the Liedtke Lab at Duke University and continued as a line within our mouse colony. All animal procedures were approved by The Duke University IACUC.

### **RT-qPCR from cultured neuronal cells and microdissected spinal cord dorsal horn**

oligodT-initiated reverse transcription of 1  $\mu$ g total RNA, DNA-se treated, was subjected to RT-qPCR using primers specific for *Kcc2* for rat and *KCC2* for human sequences, normalized for neuronal  $\beta_{III}$ -tubulin, as



previously described (Yeo et al., 2009). For cultured neurons, total RNA was extracted from pelleted cells, and for spinal cord tissue it was extracted from microdissected lumbar spinal cord dorsal horn.

### **Behavioral assessments**

For pain-related assays, hind paw withdrawal in response to mechanical stimuli was assessed with von Frey hairs (vFH) using an automated vFH apparatus (Moore et al., 2013). Hind paw withdrawal in response to a red light-evoked heat stimulus was tested with a Hargreaves' apparatus. Sensitization was implemented by sciatic nerve injury via ligation or by inflammatory injury via injection of CFA into the foot pad. For in vivo assays, mice were injected starting on day 1 after injury with 10 or 30 mg/kg KP, intraperitoneally (i.p.).

To study itch, mice were sensitized with 0.5% 2,4-dinitrofluorobenzene (DNFB) topically to their dorsal neck, as in (Zhang et al., 2015). KP was injected i.p at 30 mg/kg following an experimental time-line as shown in Suppl Fig. 2.

Intrathecal compound or viral vector injection was conducted as in (Peterson et al., 2019).

Vestibulomotor function, cerebellar coordination, and motor stamina were assessed using an automated rotarod (RR) (Ugo Basile, Italy) (Heyser et al., 2013). Animals were RR-trained pre-injection of KP, which was injected daily, and their stamina/ RR performance was recorded for two weeks.

Conditioned place preference (CPP) was conducted as in (Park et al., 2013) by recording choice behavior for one of two accessible chambers after 7 days of conditioning; animals were treated with KP at 30 mg/kg or vehicle in one chamber. CPP scores were calculated as post-conditioning time minus preconditioning time spent in the treatment-paired chamber.

### **Chromatin immunoprecipitation**

ChIP assay was carried out as described previously (Yeo et al., 2009) using primary cortical neurons ( $0.7 \times 10^6$ ).

### **Cultured neuron immuno-cytochemistry**

Immuno-cytochemistry labeling of cultured neuronal cells was carried out as previously described (Yeo et al., 2009) using antibodies specific for  $\delta$ -cat,  $\beta$ -cat,  $\beta$ -tubulin<sub>III</sub>, and FLAG epitope. Imaging and morphometry of acquired images was conducted using a Zeiss LSM710 microscopy platform with Zen software.

## **Spinal cord immuno-histochemistry**

Immunohistochemical labeling of lumbar spinal cord was conducted as in (Liedtke et al., 1996; Liedtke et al., 1998; Liedtke et al., 2013) using KCC2-specific antibodies.

## **Chloride imaging**

Chloride imaging of primary cultured cortical neurons was conducted as in (Kuner and Augustine, 2000; Liedtke et al., 2013; Yeo et al., 2009). Clomeleon ratiometric fluorescent chloride indicator protein was transfected into neurons and ratios were acquired on an Olympus BX10 microscope using RATIOTOOL software. Calibration experiments were conducted as in (Kuner and Augustine, 2000; Yeo et al., 2009).

## **Spinal cord dorsal horn electrophysiology**

Spinal cord slices (300-400  $\mu\text{m}$  thickness) were prepared from male mice 5-7 weeks of age as in (Chen et al., 2017; Sun et al., 2018). The gramicidin perforated patch method was applied to measure reversal potential for GABA of patched layer-II neurons; 1 mM GABA was applied with a puff-pipette (Billups and Attwell, 2002; Jiang et al., 2014).

## **Drug affinity responsive target stability (DARTS) assay**

DARTS assay was conducted following (Lomenick et al., 2009) using 20 $\mu\text{M}$  KP as “bait” and LC-MS/LC to identify proteins bound to KP. The assay was conducted in both the presence and absence of detergents NP40 and N-dodecyl-b-D-maltoside.

## **Kinome analysis**

Cultured rat primary cortical neurons were treated with either vehicle (DMSO 0.1%) or 1  $\mu\text{M}$  KP for 1h/24h. Protein extract was purified, trypsin-digested, and enriched for phosphopeptide via TiO<sub>2</sub> resin. Identity and quantity of enriched phosphopeptides were determined using analytical LC-MS/MS, and then samples were analyzed for differential expression (KP vs. vehicle treatment) for both time points.

**Statistics** All data are expressed as mean  $\pm$  SEM. Differences between groups were evaluated using two-tailed Student's *t* test (experimental against sham control), or in the case of multiple groups, one-way ANOVA followed by post-hoc Bonferroni test. The criterion for statistical significance is  $p < 0.05$ .

## References

- Aerts, S., Van Loo, P., Thijs, G., Mayer, H., de Martin, R., Moreau, Y., and De Moor, B. (2005). TOUCAN 2: the all-inclusive open source workbench for regulatory sequence analysis. *Nucleic Acids Res* 33, W393-396.
- Agez, M., Schultz, P., Medina, I., Baker, D.J., Burnham, M.P., Cardarelli, R.A., Conway, L.C., Garnier, K., Geschwindner, S., Gunnarsson, A., *et al.* (2017). Molecular architecture of potassium chloride co-transporter KCC2. *Scientific reports* 7, 16452.
- Akiyama, T., Nguyen, T., Curtis, E., Nishida, K., Devireddy, J., Delahanty, J., Carstens, M.I., and Carstens, E. (2015). A central role for spinal dorsal horn neurons that express neurokinin-1 receptors in chronic itch. *Pain* 156, 1240-1246.
- Arikkath, J., Peng, I.F., Ng, Y.G., Israely, I., Liu, X., Ullian, E.M., and Reichardt, L.F. (2009). Delta-catenin regulates spine and synapse morphogenesis and function in hippocampal neurons during development. *J Neurosci* 29, 5435-5442.
- Bai, G., Ren, K., and Dubner, R. (2015). Epigenetic regulation of persistent pain. *Translational research : the journal of laboratory and clinical medicine* 165, 177-199.
- Bareiss, S., Kim, K., and Lu, Q. (2010). Delta-catenin/NPRAP: A new member of the glycogen synthase kinase-3beta signaling complex that promotes beta-catenin turnover in neurons. *J Neurosci Res* 88, 2350-2363.
- Billups, D., and Attwell, D. (2002). Control of intracellular chloride concentration and GABA response polarity in rat retinal ON bipolar cells. *The Journal of physiology* 545, 183-198.
- Boulenguez, P., Liabeuf, S., Bos, R., Bras, H., Jean-Xavier, C., Brocard, C., Stil, A., Darbon, P., Cattaert, D.,

Delpire, E., *et al.* (2010). Down-regulation of the potassium-chloride cotransporter KCC2 contributes to spasticity after spinal cord injury. *Nat Med* 16, 302-307.

Bourane, S., Duan, B., Koch, S.C., Dalet, A., Britz, O., Garcia-Campmany, L., Kim, E., Cheng, L., Ghosh, A., Ma, Q., and Goulding, M. (2015). Gate control of mechanical itch by a subpopulation of spinal cord interneurons. *Science* 350, 550-554.

Braz, J.M., Etlin, A., Juarez-Salinas, D., Llewellyn-Smith, I.J., and Basbaum, A.I. (2017). Rebuilding CNS inhibitory circuits to control chronic neuropathic pain and itch. *Prog Brain Res* 231, 87-105.

Braz, J.M., Juarez-Salinas, D., Ross, S.E., and Basbaum, A.I. (2014). Transplant restoration of spinal cord inhibitory controls ameliorates neuropathic itch. *J Clin Invest* 124, 3612-3616.

Braz, J.M., Wang, X., Guan, Z., Rubenstein, J.L., and Basbaum, A.I. (2015). Transplant-mediated enhancement of spinal cord GABAergic inhibition reverses paclitaxel-induced mechanical and heat hypersensitivity. *Pain* 156, 1084-1091.

Cancedda, L., Fiumelli, H., Chen, K., and Poo, M.M. (2007). Excitatory GABA action is essential for morphological maturation of cortical neurons in vivo. *J Neurosci* 27, 5224-5235.

Chen, B., Li, Y., Yu, B., Zhang, Z., Brommer, B., Williams, P.R., Liu, Y., Hegarty, S.V., Zhou, S., Zhu, J., *et al.* (2018). Reactivation of Dormant Relay Pathways in Injured Spinal Cord by KCC2 Manipulations. *Cell* 174, 521-535 e513.

Chen, G., Kim, Y.H., Li, H., Luo, H., Liu, D.L., Zhang, Z.J., Lay, M., Chang, W., Zhang, Y.Q., and Ji, R.R. (2017). PD-L1 inhibits acute and chronic pain by suppressing nociceptive neuron activity via PD-1. *Nature neuroscience* 20, 917-926.

Cheng, L., Duan, B., Huang, T., Zhang, Y., Chen, Y., Britz, O., Garcia-Campmany, L., Ren, X., Vong, L., Lowell, B.B., *et al.* (2017). Identification of spinal circuits involved in touch-evoked dynamic mechanical pain. *Nature neuroscience* 20, 804-814.

Consortium - String. (2019). String v11.0. [string-db.org/network/9606.ENSPP00000307134](http://string-db.org/network/9606.ENSPP00000307134). (EMBL, Swiss Institute Bioinformatics).

Coull, J.A., Boudreau, D., Bachand, K., Prescott, S.A., Nault, F., Sik, A., De Koninck, P., and De Koninck, Y. (2003). Trans-synaptic shift in anion gradient in spinal lamina I neurons as a mechanism of neuropathic pain. *Nature* 424, 938-942.

Dai, S.D., Wang, Y., Zhang, J.Y., Zhang, D., Zhang, P.X., Jiang, G.Y., Han, Y., Zhang, S., Cui, Q.Z., and Wang, E.H. (2011). Upregulation of delta-catenin is associated with poor prognosis and enhances transcriptional activity through Kaiso in non-small-cell lung cancer. *Cancer science* 102, 95-103.

Dedek, A., Xu, J., Kandegedara, C.M., Lorenzo, L.E., Godin, A.G., De Koninck, Y., Lombroso, P.J., Tsai, E.C., and Hildebrand, M.E. (2019). Loss of STEP61 couples disinhibition to N-methyl-d-aspartate receptor potentiation in rodent and human spinal pain processing. *Brain* 142, 1535-1546.

Delpire, E., and Mount, D.B. (2002). Human and murine phenotypes associated with defects in cation-chloride cotransport. *Annual review of physiology* 64, 803-843.

Doyon, N., Ferrini, F., Gagnon, M., and De Koninck, Y. (2013). Treating pathological pain: is KCC2 the key to the gate? *Expert review of neurotherapeutics* 13, 469-471.

Ferando, I., Faas, G.C., and Mody, I. (2016). Diminished KCC2 confounds synapse specificity of LTP during senescence. *Nature neuroscience* 19, 1197-1200.

Ferrini, F., Trang, T., Mattioli, T.A., Laffray, S., Del'Guidice, T., Lorenzo, L.E., Castonguay, A., Doyon, N., Zhang, W., Godin, A.G., *et al.* (2013). Morphine hyperalgesia gated through microglia-mediated disruption of neuronal Cl<sup>-</sup> homeostasis. *Nature neuroscience* 16, 183-192.

Fiumelli, H., Cancedda, L., and Poo, M.M. (2005). Modulation of GABAergic transmission by activity via postsynaptic Ca<sup>2+</sup>-dependent regulation of KCC2 function. *Neuron* 48, 773-786.

Fiumelli, H., and Woodin, M.A. (2007). Role of activity-dependent regulation of neuronal chloride homeostasis in development. *Current opinion in neurobiology* 17, 81-86.

Freund, T.F., and Meskenaite, V. (1992). gamma-Aminobutyric acid-containing basal forebrain neurons innervate inhibitory interneurons in the neocortex. *Proc Natl Acad Sci U S A* 89, 738-742.

Gagnon, M., Bergeron, M.J., Lavertu, G., Castonguay, A., Tripathy, S., Bonin, R.P., Perez-Sanchez, J., Boudreau, D., Wang, B., Dumas, L., *et al.* (2013). Chloride extrusion enhancers as novel therapeutics for neurological diseases. *Nat Med* 19, 1524-1528.

Ganguly, K., Schinder, A.F., Wong, S.T., and Poo, M. (2001). GABA itself promotes the developmental switch of neuronal GABAergic responses from excitation to inhibition. *Cell* 105, 521-532.

Herskowitz, J.H., Seyfried, N.T., Duong, D.M., Xia, Q., Rees, H.D., Gearing, M., Peng, J., Lah, J.J., and Levey, A.I. (2010). Phosphoproteomic analysis reveals site-specific changes in GFAP and NDRG2 phosphorylation in frontotemporal lobar degeneration. *J Proteome Res* 9, 6368-6379.

Heyser, C.J., Vishnevetsky, D., and Berten, S. (2013). The effect of cocaine on rotarod performance in male C57BL/6J mice. *Physiol Behav* 118, 208-211.

Huberfeld, G., Wittner, L., Clemenceau, S., Baulac, M., Kaila, K., Miles, R., and Rivera, C. (2007). Perturbed chloride homeostasis and GABAergic signaling in human temporal lobe epilepsy. *The Journal of neuroscience : the official journal of the Society for Neuroscience* 27, 9866-9873.

Hwang, J.Y., and Zukin, R.S. (2018). REST, a master transcriptional regulator in neurodegenerative disease. *Current opinion in neurobiology* 48, 193-200.

Hyde, T.M., Lipska, B.K., Ali, T., Mathew, S.V., Law, A.J., Metitiri, O.E., Straub, R.E., Ye, T., Colantuoni, C., Herman, M.M., *et al.* (2011). Expression of GABA signaling molecules KCC2, NKCC1, and GAD1 in cortical development and schizophrenia. *J Neurosci* 31, 11088-11095.

Jackson, A., Alkhlaif, Y., Papke, R.L., Brunzell, D.H., and Damaj, M.I. (2019). Impact of modulation of the alpha7 nicotinic acetylcholine receptor on nicotine reward in the mouse conditioned place preference test. *Psychopharmacology*.

Ji, R.R., Nackley, A., Huh, Y., Terrando, N., and Maixner, W. (2018). Neuroinflammation and Central Sensitization in Chronic and Widespread Pain. *Anesthesiology* 129, 343-366.

Jiang, C.Y., Fujita, T., and Kumamoto, E. (2014). Synaptic modulation and inward current produced by oxytocin in substantia gelatinosa neurons of adult rat spinal cord slices. *Journal of neurophysiology* 111, 991-1007.

Kahle, K.T., Deeb, T.Z., Puskarjov, M., Silayeva, L., Liang, B., Kaila, K., and Moss, S.J. (2013). Modulation of neuronal activity by phosphorylation of the K-Cl cotransporter KCC2. *Trends Neurosci*.

Kahle, K.T., Khanna, A., Clapham, D.E., and Woolf, C.J. (2014a). Therapeutic restoration of spinal inhibition via druggable enhancement of potassium-chloride cotransporter KCC2-mediated chloride extrusion in peripheral neuropathic pain. *JAMA neurology* 71, 640-645.



Kahle, K.T., Merner, N.D., Friedel, P., Silayeva, L., Liang, B., Khanna, A., Shang, Y., Lachance-Touchette, P., Bourassa, C., Levert, A., *et al.* (2014b). Genetically encoded impairment of neuronal KCC2 cotransporter function in human idiopathic generalized epilepsy. *EMBO Rep* 15, 766-774.

Knockaert, M., Wieking, K., Schmitt, S., Leost, M., Grant, K.M., Mottram, J.C., Kunick, C., and Meijer, L. (2002). Intracellular Targets of Paullones. Identification following affinity purification on immobilized inhibitor. *The Journal of biological chemistry* 277, 25493-25501.

Koch, S.C., Acton, D., and Goulding, M. (2018). Spinal Circuits for Touch, Pain, and Itch. *Annual review of physiology* 80, 189-217.

Kosik, K.S., Donahue, C.P., Israely, I., Liu, X., and Ochiishi, T. (2005). Delta-catenin at the synaptic-adherens junction. *Trends in cell biology* 15, 172-178.

Kuner, R. (2010). Central mechanisms of pathological pain. *Nat Med* 16, 1258-1266.

Kuner, T., and Augustine, G.J. (2000). A genetically encoded ratiometric indicator for chloride: capturing chloride transients in cultured hippocampal neurons. *Neuron* 27, 447-459.

Kunick, C., Lauenroth, K., Leost, M., Meijer, L., and Lemcke, T. (2004). 1-Azakenpaullone is a selective inhibitor of glycogen synthase kinase-3 beta. *Bioorg Med Chem Lett* 14, 413-416.

Lardenoije, R., Iatrou, A., Kenis, G., Kompotis, K., Steinbusch, H.W., Mastroeni, D., Coleman, P., Lemere, C.A., Hof, P.R., van den Hove, D.L., and Rutten, B.P. (2015). The epigenetics of aging and neurodegeneration. *Progress in neurobiology* 131, 21-64.

Li, L., Chen, S.R., Chen, H., Wen, L., Hittelman, W.N., Xie, J.D., and Pan, H.L. (2016). Chloride Homeostasis Critically Regulates Synaptic NMDA Receptor Activity in Neuropathic Pain. *Cell reports* 15, 1376-1383.

Liang, L., Lutz, B.M., Bekker, A., and Tao, Y.X. (2015). Epigenetic regulation of chronic pain. *Epigenomics* 7, 235-245.

Liedtke, W., Edelman, W., Bieri, P.L., Chiu, F.C., Cowan, N.J., Kucherlapati, R., and Raine, C.S. (1996). GFAP is necessary for the integrity of CNS white matter architecture and long-term maintenance of myelination. *Neuron* 17, 607-615.

Liedtke, W., Edelman, W., Chiu, F.C., Kucherlapati, R., and Raine, C.S. (1998). Experimental autoimmune encephalomyelitis in mice lacking glial fibrillary acidic protein is characterized by a more severe clinical course and an infiltrative central nervous system lesion. *Am J Pathol* 152, 251-259.

Liedtke, W., Yeo, M., Zhang, H., Wang, Y., Gignac, M., Miller, S., Berglund, K., and Liu, J. (2013). Highly conductive carbon nanotube matrix accelerates developmental chloride extrusion in central nervous system neurons by increased expression of chloride transporter KCC2. *Small (Weinheim an der Bergstrasse, Germany)* 9, 1066-1075.

Liu, B., Paton, J.F., and Kasparov, S. (2008). Viral vectors based on bidirectional cell-specific mammalian promoters and transcriptional amplification strategy for use in vitro and in vivo. *BMC Biotechnol* 8, 49.

Liu, M.L., Zang, T., and Zhang, C.L. (2016). Direct Lineage Reprogramming Reveals Disease-Specific Phenotypes of Motor Neurons from Human ALS Patients. *Cell reports* 14, 115-128.

Lomenick, B., Hao, R., Jonai, N., Chin, R.M., Aghajan, M., Warburton, S., Wang, J., Wu, R.P., Gomez, F., Loo, J.A., *et al.* (2009). Target identification using drug affinity responsive target stability (DARTS). *Proc Natl Acad Sci U S A* 106, 21984-21989.

Mapplebeck, J.C.S., Lorenzo, L.E., Lee, K.Y., Gauthier, C., Muley, M.M., De Koninck, Y., Prescott, S.A., and Salter, M.W. (2019). Chloride Dysregulation through Downregulation of KCC2 Mediates Neuropathic Pain in Both Sexes. *Cell reports* 28, 590-596 e594.

Mishra, S.K., and Hoon, M.A. (2015). Transmission of pruriceptive signals. *Handbook of experimental pharmacology* 226, 151-162.

Moore, C., Cevikbas, F., Pasolli, H.A., Chen, Y., Kong, W., Kempkes, C., Parekh, P., Lee, S.H., Kontchou, N.A., Yeh, I., *et al.* (2013). UVB radiation generates sunburn pain and affects skin by activating epidermal TRPV4 ion channels and triggering endothelin-1 signaling. *Proc Natl Acad Sci U S A* 110, E3225-3234.

Oh, M., Kim, H., Yang, I., Park, J.H., Cong, W.T., Baek, M.C., Bareiss, S., Ki, H., Lu, Q., No, J., *et al.* (2009). GSK-3 phosphorylates delta-catenin and negatively regulates its stability via ubiquitination/proteasome-mediated proteolysis. *The Journal of biological chemistry* 284, 28579-28589.

Orford, K., Crockett, C., Jensen, J.P., Weissman, A.M., and Byers, S.W. (1997). Serine phosphorylation-regulated ubiquitination and degradation of beta-catenin. *The Journal of biological chemistry* 272, 24735-24738.

Park, H.J., Stokes, J.A., Pirie, E., Skahen, J., Shtaerman, Y., and Yaksh, T.L. (2013). Persistent hyperalgesia in the cisplatin-treated mouse as defined by threshold measures, the conditioned place preference paradigm, and changes in dorsal root ganglia activated transcription factor 3: the effects of gabapentin, ketorolac, and etanercept. *Anesth Analg* 116, 224-231.

Pelsman, A., Hoyo-Vadillo, C., Gudasheva, T.A., Seredenin, S.B., Ostrovskaya, R.U., and Busciglio, J. (2003). GVS-111 prevents oxidative damage and apoptosis in normal and Down's syndrome human cortical

neurons. International journal of developmental neuroscience : the official journal of the International Society for Developmental Neuroscience 21, 117-124.

Peterson, C.D., Skorput, A.G.J., Kitto, K.F., Wilcox, G.L., Vulchanova, L., and Fairbanks, C.A. (2019). AAV-Mediated Gene Delivery to the Spinal Cord by Intrathecal Injection. *Methods Mol Biol* 1950, 199-207.

Price, T.J., Cervero, F., and de Koninck, Y. (2005). Role of cation-chloride-cotransporters (CCC) in pain and hyperalgesia. *Curr Top Med Chem* 5, 547-555.

Reinhardt, L., Kordes, S., Reinhardt, P., Glatza, M., Baumann, M., Drexler, H.C.A., Menninger, S., Zischinsky, G., Eickhoff, J., Frob, C., *et al.* (2019). Dual Inhibition of GSK3beta and CDK5 Protects the Cytoskeleton of Neurons from Neuroinflammatory-Mediated Degeneration In Vitro and In Vivo. *Stem Cell Reports* 12, 502-517.

Rodova, M., Kelly, K.F., VanSaun, M., Daniel, J.M., and Werle, M.J. (2004). Regulation of the rapsyn promoter by kaiso and delta-catenin. *Mol Cell Biol* 24, 7188-7196.

Sakamoto, I., Kishida, S., Fukui, A., Kishida, M., Yamamoto, H., Hino, S., Michiue, T., Takada, S., Asashima, M., and Kikuchi, A. (2000). A novel beta-catenin-binding protein inhibits beta-catenin-dependent Tcf activation and axis formation. *The Journal of biological chemistry* 275, 32871-32878.

Schultz, C., Link, A., Leost, M., Zaharevitz, D.W., Gussio, R., Sausville, E.A., Meijer, L., and Kunick, C. (1999). Paullones, a series of cyclin-dependent kinase inhibitors: synthesis, evaluation of CDK1/cyclin B inhibition, and in vitro antitumor activity. *J Med Chem* 42, 2909-2919.

Skardelly, M., Gaber, K., Schwarz, J., and Milosevic, J. (2011). Neuroprotective effects of the beta-catenin stabilization in an oxygen- and glucose-deprived human neural progenitor cell culture system. *International*

journal of developmental neuroscience : the official journal of the International Society for Developmental Neuroscience 29, 543-547.

Sommer, C. (2016). Exploring pain pathophysiology in patients. *Science* 354, 588-592.

Sora, I., Wichems, C., Takahashi, N., Li, X.F., Zeng, Z., Revay, R., Lesch, K.P., Murphy, D.L., and Uhl, G.R. (1998). Cocaine reward models: conditioned place preference can be established in dopamine- and in serotonin-transporter knockout mice. *Proc Natl Acad Sci U S A* 95, 7699-7704.

Sun, W., Zhou, Q., Ba, X., Feng, X., Hu, X., Cheng, X., Liu, T., Guo, J., Xiao, L., Jiang, J., *et al.* (2018). Oxytocin Relieves Neuropathic Pain Through GABA Release and Presynaptic TRPV1 Inhibition in Spinal Cord. *Frontiers in molecular neuroscience* 11, 248.

Tang, X., Drotar, J., Li, K., Clairmont, C.D., Brumm, A.S., Sullins, A.J., Wu, H., Liu, X.S., Wang, J., Gray, N.S., *et al.* (2019). Pharmacological enhancement of KCC2 gene expression exerts therapeutic effects on human Rett syndrome neurons and *Mecp2* mutant mice. *Science translational medicine* 11.

Tang, X., Kim, J., Zhou, L., Wengert, E., Zhang, L., Wu, Z., Carromeu, C., Muotri, A.R., Marchetto, M.C., Gage, F.H., and Chen, G. (2016). KCC2 rescues functional deficits in human neurons derived from patients with Rett syndrome. *Proc Natl Acad Sci U S A* 113, 751-756.

Tao, R., Li, C., Newburn, E.N., Ye, T., Lipska, B.K., Herman, M.M., Weinberger, D.R., Kleinman, J.E., and Hyde, T.M. (2012). Transcript-specific associations of SLC12A5 (KCC2) in human prefrontal cortex with development, schizophrenia, and affective disorders. *J Neurosci* 32, 5216-5222.

Teitz, T., Fang, J., Goktug, A.N., Bonga, J.D., Diao, S., Hazlitt, R.A., Iconaru, L., Morfouace, M., Currier, D., Zhou, Y., *et al.* (2018). CDK2 inhibitors as candidate therapeutics for cisplatin- and noise-induced hearing loss. *The Journal of experimental medicine* 215, 1187-1203.

Turner, T.N., Sharma, K., Oh, E.C., Liu, Y.P., Collins, R.L., Sosa, M.X., Auer, D.R., Brand, H., Sanders, S.J., Moreno-De-Luca, D., *et al.* (2015). Loss of delta-catenin function in severe autism. *Nature* 520, 51-56.

Winkelmann, A., Semtner, M., and Meier, J.C. (2015). Chloride transporter KCC2-dependent neuroprotection depends on the N-terminal protein domain. *Cell death & disease* 6, e1776.

Yang, Y.M., Gupta, S.K., Kim, K.J., Powers, B.E., Cerqueira, A., Wainger, B.J., Ngo, H.D., Rosowski, K.A., Schein, P.A., Ackeifi, C.A., *et al.* (2013). A small molecule screen in stem-cell-derived motor neurons identifies a kinase inhibitor as a candidate therapeutic for ALS. *Cell Stem Cell* 12, 713-726.

Yeo, M., Berglund, K., Augustine, G., and Liedtke, W. (2009). Novel repression of *Kcc2* transcription by REST-RE-1 controls developmental switch in neuronal chloride. *J Neurosci* 29, 14652-14662.

Yeo, M., Berglund, K., Hanna, M., Guo, J.U., Kittur, J., Torres, M.D., Abramowitz, J., Busciglio, J., Gao, Y., Birnbaumer, L., and Liedtke, W.B. (2013a). Bisphenol A delays the perinatal chloride shift in cortical neurons by epigenetic effects on the *Kcc2* promoter. *Proc Natl Acad Sci U S A* 110, 4315-4320.

Yeo, M., Patisaul, H., and Liedtke, W. (2013b). Decoding the language of epigenetics during neural development is key for understanding development as well as developmental neurotoxicity. *Epigenetics*: 8, 11238-1132.

Zaharevitz, D.W., Gussio, R., Leost, M., Senderowicz, A.M., Lahusen, T., Kunick, C., Meijer, L., and Sausville, E.A. (1999). Discovery and initial characterization of the paullones, a novel class of small-molecule inhibitors of cyclin-dependent kinases. *Cancer research* 59, 2566-2569.

Zhang, J.H., Chung, T.D., and Oldenburg, K.R. (1999). A Simple Statistical Parameter for Use in Evaluation and Validation of High Throughput Screening Assays. *Journal of biomolecular screening* 4, 67-73.

Zhang, Y., Yan, J., Hu, R., Sun, Y., Ma, Y., Chen, Z., and Jiang, H. (2015). Microglia are involved in pruritus induced by DNFB via the CX3CR1/p38 MAPK pathway. *Cell Physiol Biochem* 35, 1023-1033.

Zhu, L., Polley, N., Mathews, G.C., and Delpire, E. (2008). NKCC1 and KCC2 prevent hyperexcitability in the mouse hippocampus. *Epilepsy research* 79, 201-212.

## **Supplementary Materials**

**Suppl. File S1: Excel sheet #1. Compound screening results**

**Suppl. File S2: Excel sheet #2. DARTS assay**

**Suppl. File S3: Excel sheet #3. Phosphoproteomics data**

## **Detailed Methods**

## **Supplementary Tables**

## **Supplementary Figures**

-----



## Detailed Methods

### Screening in primary cortical neurons from *Kcc2*-LUC transgenic mice

Transgenic mice that express red-shifted luciferase (LUC) under the control of the *Kcc2* promoter (-2052/+476, described in (Yeo et al., 2009)), inserted into the Rosa26 locus, were previously described by our laboratory (Liedtke et al., 2013; Yeo et al., 2013a). We generated primary cortical neuronal cultures from newborn (p0) mice of this line following (Liedtke et al., 2013; Yeo et al., 2013a).

Cytosine arabinoside (2.5  $\mu$ m) was added to cultures on the second day after seeding [2 d *in vitro* (DIV)] to inhibit the proliferation of non-neuronal cells. Cell suspension was plated at a density of  $1 \times 10^6$  cells/ml onto 24-well tissue-culture dishes coated with poly-d-lysine. Cortical neuronal cultures prepared by this method yielded a majority population of neuronal cells, with negligible glia contamination, as evidenced by the absence of GFAP by Western blotting.

After a week in culture, neurons were treated with compounds (100 nM for 48h). LUC activity was then determined for each compound. Culture supernatant was removed and cells were lysed with 150  $\mu$ l lysis buffer (Targeting Systems CA, USA cat. CLR1). LUC activity was measured with a *RedLuciferase Assay kit* (Targeting Systems cat. FLAR) according to the manufacturer's instructions. A Veritas microplate luminometer was used to measure luminescence; for each treatment triplicates of 40  $\mu$ l cell lysates (from each 24-well tissue-culture dish) were used and 25 $\mu$ l substrate was injected per well. To evaluate the quality of screening methodology, Z' factor (Zhang et al., 1999) was ascertained using 0.5% (v/v) DMSO as negative control and Trichostatin A as positive control. Relative Light units (RLU) for each treatment was derived from Light Units (compound treatment)/ vehicle treatment (0.5% DMSO).

The primary screen encompassed three levels of LUC measurements. The first level of screening yielded a total of 137 compounds with cut-off RLU >125% LUC activity. These 137 compounds were subject to second round of screening, which was carried out in duplicate independent assays to yield the top 103 compounds sorted for highest RLU. The 103 compounds were then subjected to a third round of screening carried out in duplicate independent assays to yield the top 40 compounds which were again ranked. The best 22 of these 40 compounds (ranked for highest RLU activity) were subjected to secondary screening: Cultured neurons were treated with the 22 compounds; RT-qPCR and Clomeleon imaging methodologies (Yeo et al., 2009)

were used to determine effects of compounds on *Kcc2* mRNA expression and [Cl<sup>-</sup>]<sub>i</sub>, respectively. Each compound was ranked based on composite scores from primary and secondary screening.

### **Human neuronal cultures**

The neuron-enriched cultures were established from fetal cortical specimens at 15–20 weeks of gestation. The protocols for tissue processing complied with all federal and institutional guidelines. The cultures were plated on PEI (polyethyleneimine solution) substrate and maintained in Neurobasal media supplemented with B27 as described (Pelsman et al., 2003; Yeo et al., 2013a).

For RT-qPCR, the cell pellets were collected after treatments with vehicle (0.1% DMSO) or KP (50, 100, and 400 nM) for 48h starting at day 6 in vitro.

For immunostaining, the cultures were treated for 2 – 4 days with vehicle or 400 nM KP, fixed with 4% PFA at day 10, and processed for double-staining with anti-KCC2 and anti-synaptophysin or anti-NeuN (see antibody table). The 0.34 micrometer confocal slices through entire cell layers at different optical fields (n = 17 – 28 for each group) of the fixated cultures were acquired using a Zeiss LSM700 confocal microscope. Image Z-stacks were analyzed using Imaris 9.2.1 software. Optical density intensity sum values for each stack/channel were divided by corresponding data volumes and the resulting values were normalized to the number of specifically labeled cells within each stack. There were no significant differences in the number of cells between vehicle and KP-treated groups.

### **δ-catenin DNA constructs, transgenesis vectors**

Plasmid containing human δ-catenin (CTNND2, NM\_001288717) open reading frame was obtained from GeneCopeia (EX-A4285-M02) and cloned into pCMV-ENTER vector (Origene PS100001). Site-directed mutagenesis using Phusion DNA Polymerase enzyme (ThermoFisher F549L) in conjunction with complementary primers bearing the specific mutation were used to generate the S276A δ-catenin mutation S276A. PCR was followed by Dpn1 enzyme digestion to remove parental plasmid DNA. All constructs were verified by sequencing. pCS-CMV-tdTomato plasmid was obtained from Addgene (cat. #30530).

Plasmid pAAV-hSyn-eNpHR 3.0-EYFP from Addgene (26972) was cut with Age I and Hind III enzymes to excise the eNpHR 3.0-EYFP open reading frames. The control tdTomato open reading frame as well as the wild-type and mutant delta catenin open reading frames were generated with Age I and Hind III ends by PCR and subsequently inserted into the Age I / Hind III digested pAAV-hSyn plasmid. Orientation and sequence fidelity in the final constructs were verified by PCR and sequencing. AAV9 particles were packaged by the Duke University Viral Vector Core facility and were used at a titer of  $10^{12}$  viral genome copies per mL.

### **Kcc2 promoter luciferase reporter assays**

A fragment of the mouse *Kcc2* gene promoter (position -2052kbp to +476kbp) was amplified from genomic DNA prepared from cultured mouse primary glial cells. A 2.5kb PCR fragment was cloned into the pGL4.17-Basic Vector (Promega) to generate the *Kcc2* promoter reporter construct. TCF and Kaiso binding sites were identified in this fragment. Using wild-type construct pGL4.17-*Kcc2* as a template, site-directed mutagenesis using Phusion DNA Polymerase enzyme (Thermo Fisher F549L) in conjunction with complementary primers bearing the specific mutation were used to mutate the Kaiso and TCF DNA-binding sites. PCR was followed by Dpn1 enzyme digestion to remove parental plasmid DNA. All constructs were verified by sequencing.

N2a cells were grown to 90% confluency in 24-well dishes in 0.4 mL of medium (DMEM, 2% Fetal Bovine Serum, 2 mM glutamine, 1% Non-essential amino acids, and 1% Penicillin/Streptomycin). Cells were transiently transfected using TurboFect reagent (Thermo Fisher R0531), with 500 ng of the pGL4.17-constructs plus 20 ng of the control Renilla plasmid (Promega, E2231) to normalize for transfection efficiency. Twenty-four hours after transfection, luminescence was measured using the Dual-Luciferase® Reporter Assay System (Promega) in a microplate luminometer (Veritas, Turner Biosystems). Mutant promoters were compared to WT, and the response of the respective promoter to KP (400 nM) was measured. Three independent transfection experiments were carried out and LUC assays were done in triplicates for each transfection. RLU is expressed as firefly luciferase activity relative to Renilla LUC activity.

## RT-qPCR

Total RNA was isolated from cultured cell samples using Directzol RNA miniprep kit (ZymoResearch). The protocol includes DNase digestion to exclude genomic DNA from preparations. Total RNA (1µg) was reverse transcribed using oligo primers (dT) and SuperScriptIII first-strand synthesis kit (Invitrogen). Gene expression was assessed by quantitative real-time PCR using 2× SYBR Green Master Mix (Qiagen) and a three-step cycling protocol (anneal at 60°C /elongate at 72°C, denature at 95°C). Specificity of primers was verified by dissociation/melting curve for the amplicons when using SYBR Green as a detector. All reactions were performed in triplicates. The amount of target messenger RNA (mRNA) in the experimental group relative to that in the control was determined from the resulting fluorescence and threshold values (Ct) using the  $\Delta\Delta C_t$  method.  $\beta_{III}$ -tubulin was used as housekeeping gene.

## Behavioral assessments

For pain-related behavior, mechanical allodynia was assessed with von Frey filaments (Ugo Basile, Italy). The mice were placed on a 5×5-mm wire-mesh grid floor in individual compartments to avoid visual stimulation and allowed to adapt for 0.5 h prior to the von Frey test. The von Frey filament was then applied to the middle of the plantar surface of the hind paw with 5g force. The withdrawal responses following the hind paw stimulation were measured at least three times, and the mechanical allodynia, which was defined as an increase in the number of withdrawal responses to the stimulation, was compared.

In addition, paws were stimulated with heat from underneath applied by an infrared beam (Hargreaves' test apparatus, IR level 40; Ugo Basile), and withdrawal latencies were recorded.

To assess scratching behavior as a behavioral correlate of itch, mice were shaved at the dorsal neck where topical application of 0.5% DNFB was applied (day 1). At days 5, 7, 9, and 11, mice received intraperitoneal (i.p.) injection of either KP or vehicle followed by 0.25% DNFB topical applications 4 hr later. On day 12, mice were allowed to acclimate to a Plexiglas chamber for at least 30 mins before performing itch behavior test. Scratching behavior was recorded by a Panasonic video camera for a 30-min observation period. Hind limb scratching behavior directed toward the shaved area at the nape of neck was observed. One scratch is defined as a lifting of the hind limb toward the injection site and then a replacing of the limb back to the floor,

regardless of how many scratching strokes take place between those two movements. Behavioral analysis was conducted by observers blinded to treatment procedure. DNFB-induced scratching behavior was recorded on day 12 for 1h. One scratch bout is defined as a lifting of the hind limb toward the injection site and then a replacing of the limb back to the floor, regardless of how many scratching strokes take place between those two movements. To determine the effect of KP on scratching behavior induced by DNFB, 30 mg/kg of KP was i.p. injected 20 min before each of DNFB challenge from day 5 to day 11.

For assessment in rotarod (RR), all animals received training prior to experiments; mice were placed on the RR apparatus set in an accelerating rotational speed mode (3–30 rpm, 300 s max) per trial. Following training, the average time to fall from the rotating cylinder over three trials was recorded as baseline latency (4-40rpm, 300s max/trial). Mice were injected daily with either vehicle or drug compounds before RR tests. Latency to fall was measured (4-40rpm, 300s max/trial (inter-trial interval is at least 15 min). The average latency to fall from the rod was recorded for each animal.

Conditioned place preference (CPP) was conducted using a CPP box, which consists of two conditioning chambers distinguished by visual and sensory cues, along with a small buffering chamber. All mice received a 3-day preconditioning habituation period with free access to both conditioning chambers and the time spent in each chamber was recorded for 15 min on day 3 after habituation. On conditioning days (day 4-10), mice first received the vehicle control (i.p. 5% DMSO, 5% Tween-80 in normal saline) paired with a randomly chosen chamber in the morning. After 4 hours, mice received KP (i.p. 30mg/kg) or vehicle, paired with the other chamber. During the conditioning, mice were allowed to stay only in the paired chamber for 15 min without access to other chambers. On test day (d11), mice were placed in the buffering chamber with free access to both conditioning chambers and choice behavior was recorded for 15 min. The CPP scores were calculated as post-conditioning time minus preconditioning time spent in the paired chamber.

### **Chromatin immunoprecipitation**

ChIP assay was carried out as described previously (Yeo et al., 2009; Yeo et al., 2013a). Primary cortical neurons ( $0.7 \times 10^6$ ) were used for each ChIP experiment. Cells were crosslinked with 1% formaldehyde for 30 min, washed twice with cold PBS, resuspended in lysis buffer [1%SDS, 10 mM EDTA, and 50 mM Tris-

HCl, pH 8.0, with protease inhibitor cocktail (Roche)], and sonicated for 15 s pulses. The lysates were clarified by centrifugation at 10,000 rpm for 10 min at 4°C in a microcentrifuge. One-tenth of the total lysate was used as input control of genomic DNA. Supernatants were collected and diluted in buffer (1% Triton X-100, 2 mM EDTA, 150 mM NaCl, 20 mM Tris-HCl, pH 8.0, and protease inhibitor cocktail) followed by immunoclearing with 1 mg of salmon sperm DNA, 10 ml of rabbit IgG, and 20 ml of protein A/G-Sepharose (Santa Cruz Biotechnology) for 1h at 4°C. Immunoprecipitation was performed overnight at 4°C with 2 mg of each specific antibody. Precipitates were washed sequentially for 10 min each in TSE1 buffer (0.1% SDS, 1% Triton X-100, 2 mM EDTA, 150 mM NaCl, and 20 mM Tris-HCl, pH 8.0), TSE2 (TSE1 with 500 mM NaCl), and TSE3 (0.25 M LiCl, 1% NP-40, 1% deoxycholate, 1 mM EDTA, and 10 mM Tris-HCl, pH 8.0). Precipitates were then washed twice with 10 mM Tris/0.1 mM EDTA, pH 7.8 and extracted with 1% SDS containing 0.1 M NaHCO<sub>3</sub>. Eluates were pooled and heated at 65°C for 4 h to reverse formaldehyde crosslinking. DNA fragments were purified with Qiagen Qiaquick spin kit. For CHIP PCR, 1 µl of a 25 µl DNA extraction was used.

### **Immuno-cytochemistry of cultured neurons**

Immunocytochemistry labeling of cultured neuronal cells was carried out as previously described (Liedtke et al., 2013; Yeo et al., 2009; Yeo et al., 2013a). Primary antibodies are shown in the antibody table. Anti-KCC2 primary antibodies were validated with developing rat primary cortical neurons; we observed an increase in staining pattern that tightly matched increase of *Kcc2* mRNA expression (Liedtke et al., 2013; Yeo et al., 2009; Yeo et al., 2013a). Secondary antibodies used were goat anti-mouse IgG Alexa Fluor 594 (Invitrogen A11032) and goat anti-rabbit IgG Alexa Fluor 594 (Invitrogen A11012). DAPI stain was obtained from Sigma Aldrich (D9542). Stained cells were observed using an inverted confocal microscope (Zeiss LSM780).

We obtained stacks of images recorded at 0.35 µm intervals through separate channels with a 63x oil-immersion lens (NA, 1.40, refraction index, 1.45). Zen software (Zeiss) was used to construct composite images from each optical series by combining the images recorded through the different channels, and the same software was used to obtain Z projection images (image resolution: 1024 × 1024 pixels; pixel size: 0.11 µm). ImageJ was used for morphometry.

## **Spinal cord immuno-histochemistry**

All mice were deeply anaesthetized with isoflurane and then transcardially perfused with ice-cold 4% paraformaldehyde in 0.1 M phosphate buffer, pH 7.4 (4% PFA). Dissected spinal cord samples were then post-fixed overnight in 4% PFA at 4 °C, cryoprotected in a 20% sucrose solution in PBS at 4 °C, frozen in Tissue-Tek OCT (Sakura), and stored at -80 °C until sectioning. Samples were sectioned at 20 µm using a cryostat (Microm HM 505N). The sections were blocked with 2% bovine serum albumin (BSA) in PBS with 0.3% Triton X-100 (Blocking solution) at room temperature for 1h. The sections were treated with primary antibody in blocking solution at 4°C overnight. The sections were washed three times followed by secondary antibody treatment at 4°C for 2 hours. Anti-KCC2 antibody was validated as described above for immunocytochemistry. The goat anti-rabbit IgG Alexa Fluor 488 was obtained from Invitrogen (A-11008). Morphometry was conducted using ImageJ with region-of-interest Rexed laminae I-II.

## **Drug Affinity Responsive Target Stability (DARTS) assay**

Cultured primary rat cortical neurons were treated with either vehicle DMSO (0.1%) or 20 µM KP for 30h. Cells were lysed in ice-cold lysis buffer (Tris.Cl pH8 50mM, NaCl 150mM, NP40 0.5%, N-dodecyl-b-D-maltoside 0.5%, Phosphatase Inhibitor (Pierce #88667) and Protease Inhibitor (Roche #11836153001)). Protein concentrations were determined by Bio-Rad DC Protein Assay kit using bovine albumin as standard. All steps were performed on ice. Samples were warmed to room temperature and digested with pronase (final concentration 1:500) for 30 min at 30 °C. Digestion was halted using 0.5M EDTA. Only proteins not bound to KP were digested. The protein mixture was dialyzed using dialysis cassettes (Thermo Fisher 66203, 2K MWCO) and analyzed by LC-MS/MS method to identify proteins that are bound to KP, the latter step carried out in the Duke Proteomics Core Laboratory.

## Kinome analysis

Cultured rat primary cortical neurons were treated with either vehicle DMSO (0.1%) or 1  $\mu$ M KP for 1h/24h. Cells were lysed in non-detergent-containing buffer (Tris.Cl pH8 50mM, NaCl 150mM, 0.5% Phosphatase Inhibitor (Pierce #88667) and Protease Inhibitor (Roche #11836153001)). 500  $\mu$ L was removed and solid urea was added to a final concentration of 8M. Samples were sonicated for further solubilization. After clearing of insoluble material by centrifugation, protein concentration was measured by Bradford assay. 250  $\mu$ g of total protein was removed from each sample and solubilization buffer was added to normalize all samples to 0.93  $\mu$ g/ $\mu$ L protein. Samples were then spiked with bovine alpha-casein to 30 fmol/ $\mu$ g of total protein. Samples were reduced with 10 mM DTT at 32 °C for 45 min and then alkylated with 20 mM iodoacetamide at room temperature for 30 min. Samples were trypsin digested at 1:25 (enzyme-to-protein) overnight at 32 °C. Following acidification with TFA to pH 2.5, samples were subjected to a C18 solid-phase extraction cleanup. Eluted peptides were split 80% for phosphopeptide analysis and 20% reserved for unbiased differential expression. The phosphopeptide fraction (200  $\mu$ g) was then frozen and lyophilized prior to phosphopeptide enrichment.

TiO<sub>2</sub> Enrichment. Samples were resuspended in 65  $\mu$ L of 1M glycolic acid in 80% MeCN/1% TFA and were enriched on TiO<sub>2</sub> resin using a 10  $\mu$ L GL Sciences microliter TiO<sub>2</sub> spin tips following an established protocol ([http://www.genome.duke.edu/cores/proteomics/samplepreparation/documents/GL\\_SpinColumnProtocol\\_bmr\\_ejs\\_mt\\_061713.pdf](http://www.genome.duke.edu/cores/proteomics/samplepreparation/documents/GL_SpinColumnProtocol_bmr_ejs_mt_061713.pdf)). After elution and acidification, samples were lyophilized to dryness and resuspended in 100  $\mu$ L of 0.15% TFA in water. After cleanup using a C18 STAGE tip, and resuspension in 2% acetonitrile, 0.1% TFA, 10 mM citric acid samples were quantified.

Quantitative analysis of Phosphopeptide Enriched Samples. Quantitative LC-MS/MS was performed in singlicate (4 $\mu$ L=33% of the total sample each injection) for phosphopeptide-enriched samples using a nanoAcquity UPLC system (Waters Corp) coupled to a Thermo QExactive Plus high resolution accurate mass tandem mass spectrometer (Thermo) via a nanoelectrospray ionization source. Briefly, the sample was first trapped on a Symmetry C18 300 mm  $\text{Å}$ ~ 180 mm trapping column for 6 min at 5l/min (99.9/0.1 v/v water/acetonitrile 0.1% formic acid), after which the analytical separation was performed on a 1.7  $\mu$ m Acquity BEH130 C18 75 mm  $\text{Å}$ ~250 mm column (Waters Corp). Peptides were held at 3% acetonitrile with 0.1% formic acid for 5 min and then subjected to a linear gradient from 3 to 30% acetonitrile with 0.1% formic acid



over 90 min at a flow rate of 400 nL/min at 55°C. Data collection on the QExactivePlus mass-spec was performed in a data-dependent acquisition (DDA) mode following protocol of the manufacturer.

### **Chloride imaging**

We followed methodology described previously (Kuner and Augustine, 2000; Liedtke et al., 2013; Yeo et al., 2009). A Clomeleon expression plasmid was transfected into primary cortical neurons by electroporation (Amxa Nucleofector Device). Transfected neurons were verified by yellow fluorescent protein (YFP) fluorescence, and ratiometric images (excitation at  $\lambda = 434$  nm, dual emission at  $\lambda = 485$  and 535 nm; for resting chloride, six stable frames at a rate 12 of per minute were captured, which were averaged) were acquired using RATIOTOOL program. Calibration of Clomeleon signals (535 nm/485 nm emission ratio) was performed by using tributyltin-nigericin to establish a standard curve (Pond et al., 2006), which was then normalized for measured intraneuronal pH to take into account the pH sensitivity of Clomeleon.

### **Spinal cord dorsal horn electrophysiology**

For spinal cord slice preparation, adult (5-7 weeks) male mice were anesthetized with urethane (1.5-2.0 g/kg, i.p.). The lumbosacral spinal cord was microsurgically removed and submerged into ice-cold dissection media which was saturated with 95% O<sub>2</sub> and 5% CO<sub>2</sub> at room temperature. After extraction and still under anesthesia, animals were euthanized. Transverse slices (300-400  $\mu$ m) were cut using a vibrating microslicer (VT1200s Leica). The slices were incubated at 32°C for at least 30 min in regular artificial cerebrospinal fluid (aCSF), equilibrated with 95% O<sub>2</sub> and 5% CO<sub>2</sub>.

The following solutions were used: Dissection solution: Sucrose 240 mM, NaHCO<sub>3</sub> 25 mM, KCl 2.5 mM, NaH<sub>2</sub>PO<sub>4</sub> 1.25 mM, CaCl<sub>2</sub> 0.5 mM, MgCl<sub>2</sub> 3.5 mM (Cheng et al., 2017). Regular artificial cerebrospinal fluid (ACSF): NaCl 117 mM, KCl 3.6 mM, MgCl<sub>2</sub> 1.2 mM, CaCl<sub>2</sub> 2.5 mM, NaHCO<sub>3</sub> 25 mM, NaH<sub>2</sub>PO<sub>4</sub> 1.2 mM, glucose 11 mM. The pH value of ACSF or dissection solution was adjusted to 7.4 when saturated with the gas. Normal intrapipette solution (pH 7.2 and 310 mOsm): K-methylsulfate 115 mM, KCl 25 mM, MgCl<sub>2</sub> 2 mM, HEPES 10 mM, GTP-Na 0.4 mM and Mg-ATP 5 mM.

Electrophysiological recordings were conducted as follows. A slice was placed in the recording chamber and completely submerged and superfused at a rate of 2-4 ml/min with aCSF saturated with 95% O<sub>2</sub> and 5% CO<sub>2</sub> at room temperature. Perforated patch-clamp was used to avoid alteration of the [Cl<sup>-</sup>]<sub>i</sub>. To measure the chloride equilibrium potential ( $E_{Cl}$ ), gramicidin D (80 µg/mL with 0.8% DMSO final concentration, from an 8 mg/mL stock in DMSO) was added to the intrapipette solution, and 6-cyano-7-nitroquinoxaline-2,3-dione (CNQX, 10 µM), D<sub>L</sub>-2-amino-5-phosphonovaleric acid (APV, 50 µM), and tetrodotoxin (TTX, 0.5 µM) were added to the aCSF solution. The tip of the patch pipette was filled with the normal intrapipette solution while the rest of the pipette contained the gramicidin-containing solution. After forming a seal on the membrane, we waited ~30 min for the gramicidin to induce sufficient cation-selective pores in the membrane and lowered the series resistance to below 100 MΩ. Membrane potential measurements were corrected for liquid junction potential, which was measured as in (Jiang et al., 2014). GABA (1 mM) was puffed locally and instantaneously, and the puff pipette was aimed toward the recording pipette. To determine the reversal potential of GABA-evoked currents, voltage ramps were applied from +8 to -92 mV over 200 ms at a holding potential of -42 mV. Since the voltage ramp might elicit a basal current, a control voltage ramp was applied, and 1 min later GABA was puffed followed by another voltage ramp (Billups and Attwell, 2002). The reversal potential was analyzed as in (Billups and Attwell, 2002).

Signals were acquired using an Axopatch 700B amplifier and analyzed with pCLAMP 10.3 software. Only neurons with resting membrane potential < -50 mV and stable access resistance were included.

## Supplementary Table of PCR Primers

| Target                           | Forward primer                               | Reverse primer                               |
|----------------------------------|----------------------------------------------|----------------------------------------------|
| <b>Site-directed mutagenesis</b> |                                              |                                              |
| S276A                            | 5'GCGCCCCAGGGCGGTGCACCCACCAAGCTGCAGCG3'      | 5'CGCTGCAGCTTGGTGGGTGCACCGCCCTGGGGCGC3'      |
| Kaiso 1                          | 5GGGTTCTAGACTGAACTAGTGACTCATTGGCTTTGTG3'     | 5'CACAAAGCCAATGAGTCACTAGTTTCAGTCTAGAACCC3'   |
| Kaiso 2                          | 5'GCTCAACAACCTGACGACTAGTGAGGACGGCGATGGGG3'   | 5'CCCCATCGCCGTCCTCACTAGTCGTCAGGTTGTTGAGC3'   |
| TCF                              | 5'CAAATCCCTTAGAAGCAACTAGTCGTCCATCGAAGAAGAC3' | 5'GTCTTCTTCGATGGACGACTAGTTGCTTCTAAGGGATTTG3' |
| <b>RT-qPCR</b>                   |                                              |                                              |
| Kcc2                             | 5'CTGACGGACTGCGAGGACGG3'                     | 5'GGCTGGTGTCCATCTCCTCCTCAA3'                 |
| tubulin                          | 5'CCTGCCTTTTCGTCTCTAGCCGC3'                  | 5GCTGATGACCTCCCAGAACTTGGC3'                  |
| <b>ChIP Assay</b>                |                                              |                                              |
| Kaiso 1                          | 5'AGCTCATCCCATACTCAAACCCTG3'                 | 5'GCATCTTGGAGATCTAAACTGCTAGC3'               |
| Kaiso 2                          | 5'TGCATACGGGATGAGGTGAGCAGC3'                 | 5'CAGAACCGTGGACAGCGCCTAGCG 3'                |
| TCF                              | 5'CTGAGCTGTATATCACACGGTCTGC3'                | 5'TACGCTACCCAGCTGTCTCTGATTC3'                |

## Supplementary Table of primary antibodies

| Antibody                    | Source                                                                                                |
|-----------------------------|-------------------------------------------------------------------------------------------------------|
| anti-KCC2                   | Millipore (07-432) (mouse spinal cord)<br>ThermoFisher Scientific (PA5-78544) (human, mouse, rat ICC) |
| anti- $\beta_{III}$ Tubulin | Abcam (mouse, ab78078; rabbit, ab229590)                                                              |
| anti- $\beta$ -catenin      | SigmaAldrich (PLA0230)                                                                                |
| anti- $\delta$ -catenin     | SigmaAldrich (MABN2254)                                                                               |
| anti-Synaptophysin          | ThermoFisher (MA1-213)                                                                                |
| anti-FLAG                   | SigmaAldrich (F3165)                                                                                  |
| anti-NeuN                   | BioLegend (834501)                                                                                    |

## Supplementary Figures

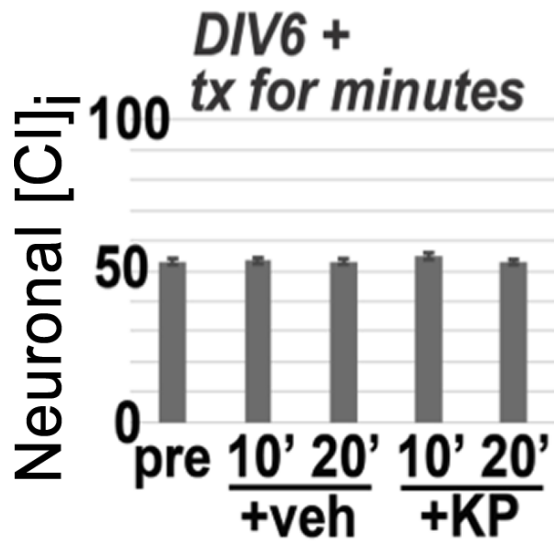

**Fig. S1. Kenpaullone does not enhance KCC2 chloride transporter mediated chloride efflux.**

Rat primary cortical neurons,  $n \geq 40$  neurons per group. No difference was observed in neuronal chloride levels, measured with clomeleon fluorescent indicator (main ms., Fig. 1C) after KP treatment vs vehicle at the 10 min and 20 min time-points.

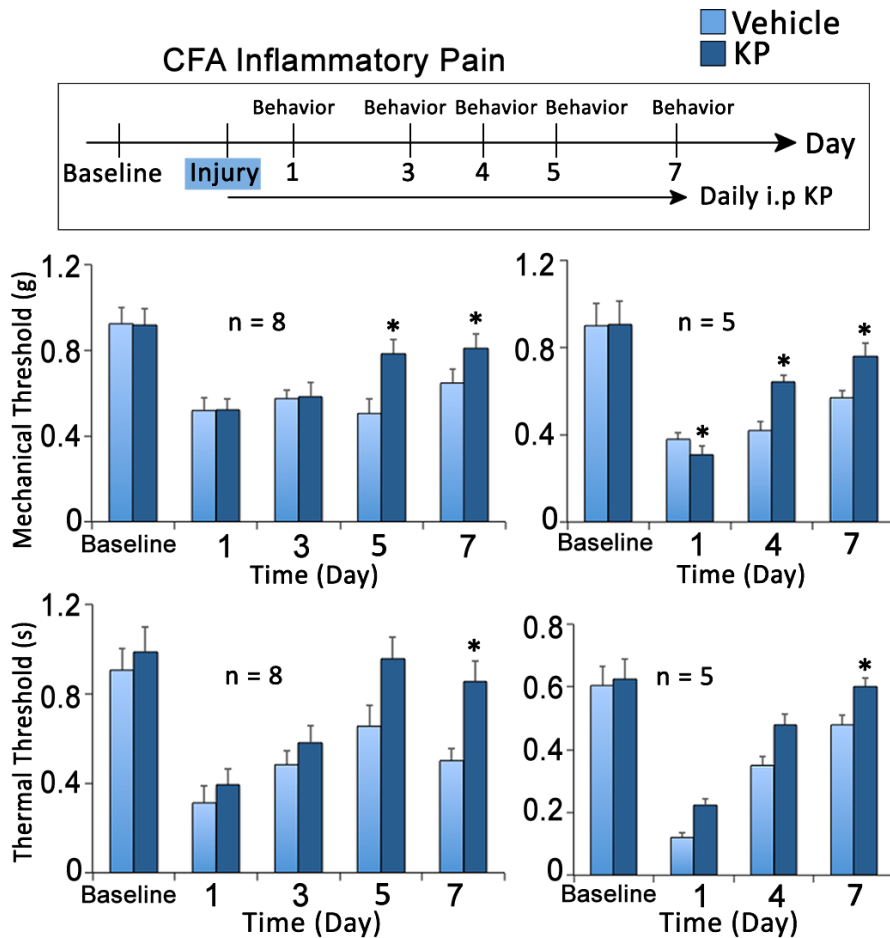

**Fig. S2A. Kenpaullone is an analgesic effect in inflammatory pain, evoked by peripheral tissue injection of CFA.**

Top Panel: Timeline for behavior assay. Middle Panel: Sensitized withdrawal thresholds in response to mechanical cues became significantly less sensitive. No significant difference in KP effects between low and high doses 10mg/kg and 30mg/kg. Bottom Panel: Thermal Pain threshold becomes significantly less sensitive only at day 7 after injury, for both low and high dose KP. \* $p < 0.05$  KP-treated vs vehicle treated, one-way ANOVA.

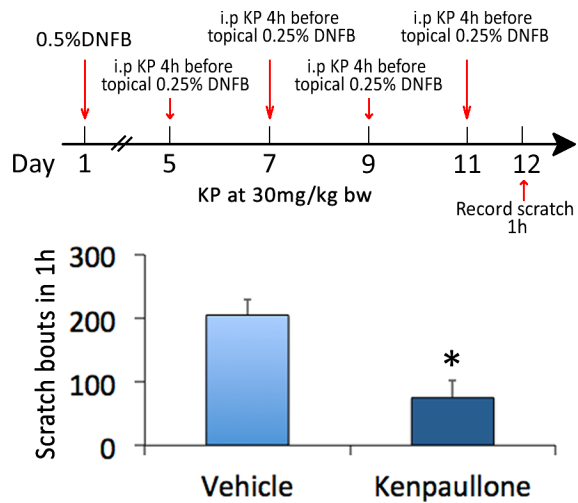

**Fig. S2B. Kenpaullone is anti-pruritic.**

Top Panel: Timeline for DNFB contact sensitization and behavioral assays.

Bottom, bar diagram: In a DNFB chronic contact dermatitis model, daily intraperitoneal injections of KP (30 mg/kg) significantly reduced robust scratching behavior of sensitized sites. n=8-10 mice per group. \* p<0.01

KP-treated vs vehicle, t-test

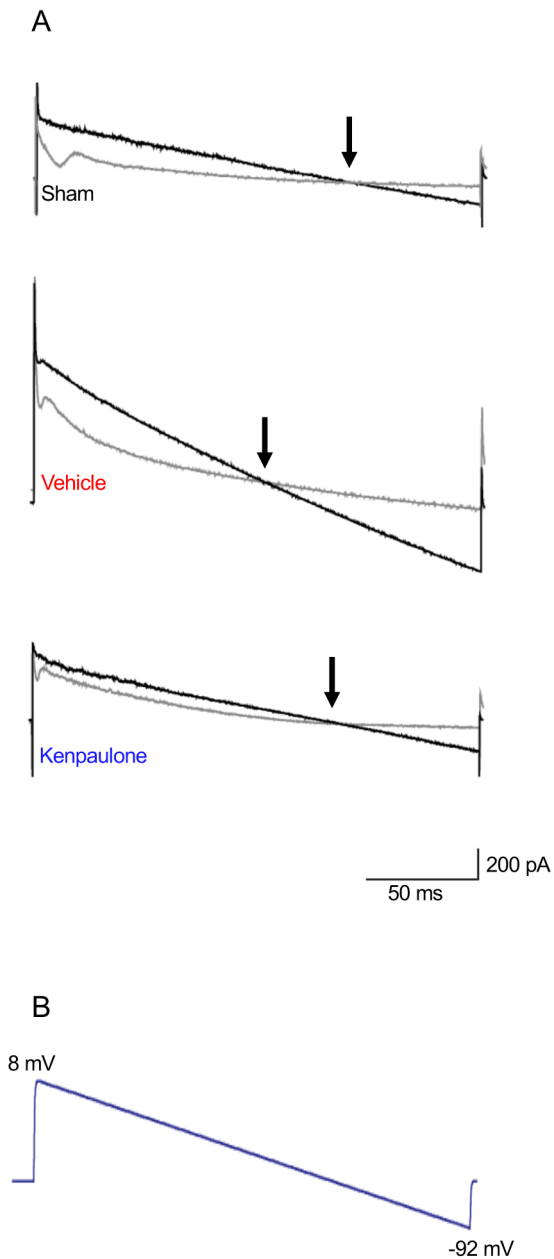

**Fig. S3. Electrophysiological recordings from spinal cord dorsal horn.**

**A)** Current responses of layer-II neurons to a voltage ramp from +8 to -92 mV (shown in panel **B**) in control (grey traces, obtained before GABA puff), or at the end of a puff of GABA (black trace) in sham, PSNL+vehicle and PSNL+KP groups. Reversal potential of the GABA-evoked current is at the voltage where the grey and black traces intersect (arrow).

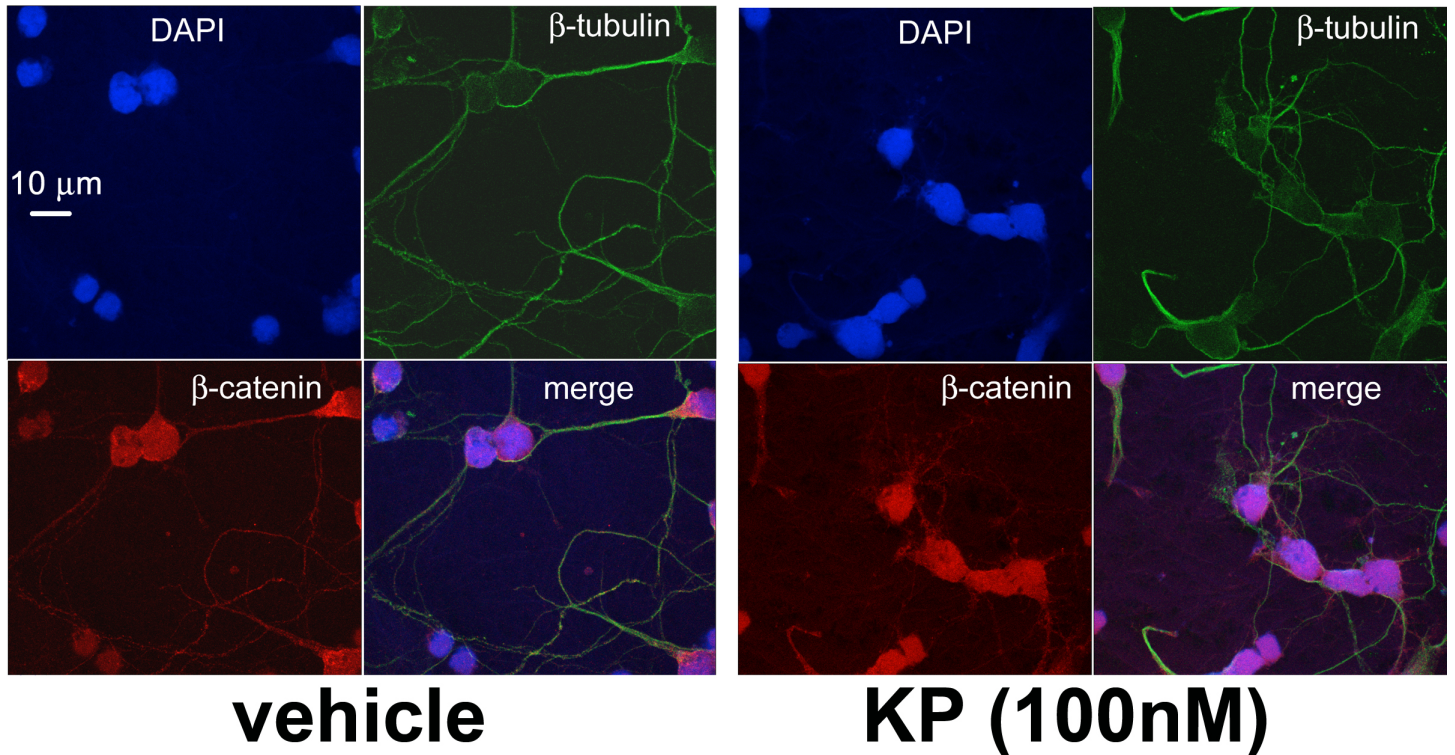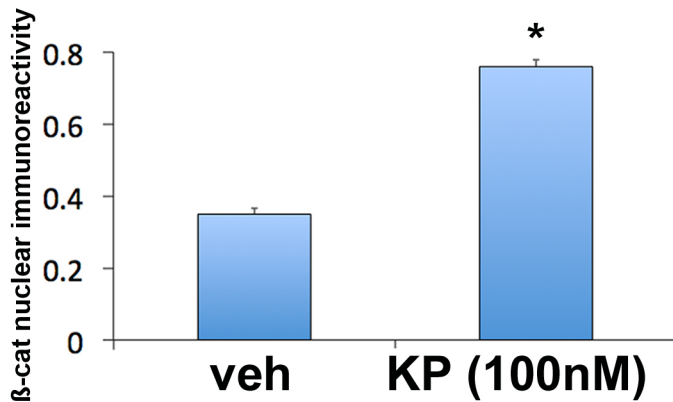

**Fig. S4A. Kenpaullone facilitates  $\beta$ -catenin translocation to the nucleus.**

Top panels, micrographs: Representative immuno-labeling of neuronal  $\beta$ -tubulin and  $\beta$ -catenin before (left-hand panels) and after KP treatment (right-hand panels) in primary cortical neurons from rat.

DAPI stain is used to define nuclear compartment.

Bottom, bar diagram: KP significantly increases  $\beta$ -catenin translocation into the nucleus.



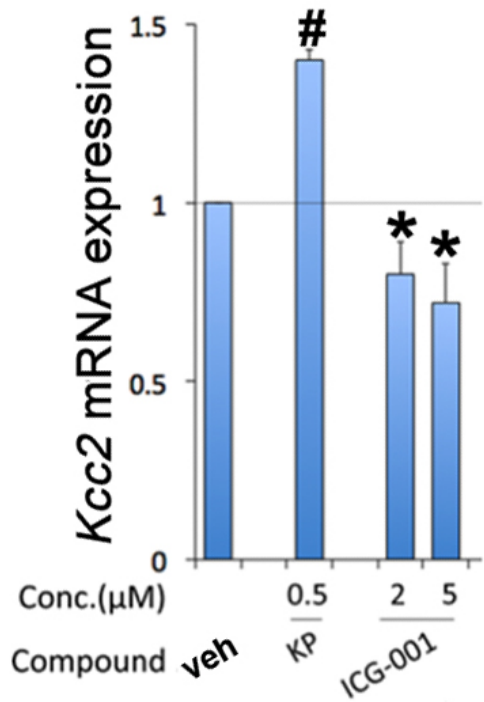

**Fig. S4B. Inhibiting  $\beta$ -catenin/TCF mediated transcription attenuates *Kcc2* expression.**

Rat primary cortical neurons, 4 independent cultures were used. Catenin-DNA interaction inhibitor ICG-001 significantly decreases *Kcc2* mRNA expression in a dose-dependent manner. Note opposite effect of KP which significantly increases *Kcc2* mRNA expression. # $p < 0.05$  increase, \* $p < 0.05$  decrease vs vehicle, one-way ANOVA.

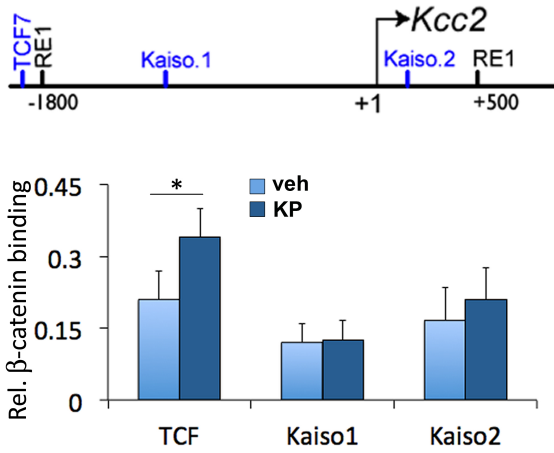

**Fig. S5A. Kenpaullone increases  $\beta$ -catenin binding to *Kcc2* promoter.**

Upper panel: Structure of mouse-*Kcc2* gene encompassing 2.5kb surrounding the TSS (+1), as in Fig. 5A.

Bottom, bar diagram: Chromatin immuno-precipitation using anti- $\beta$ -cat antibody in primary rat cortical neurons reveals binding of  $\beta$ -cat to TCF, to minor degree to Kaiso1, 2. KP treatment significantly increases binding of  $\beta$ -cat to the *Kcc2* promoter on the TCF binding site. 4 independent rat primary neuron cultures were subjected to ChIP, \* $p < 0.05$  KP-treated vs vehicle.

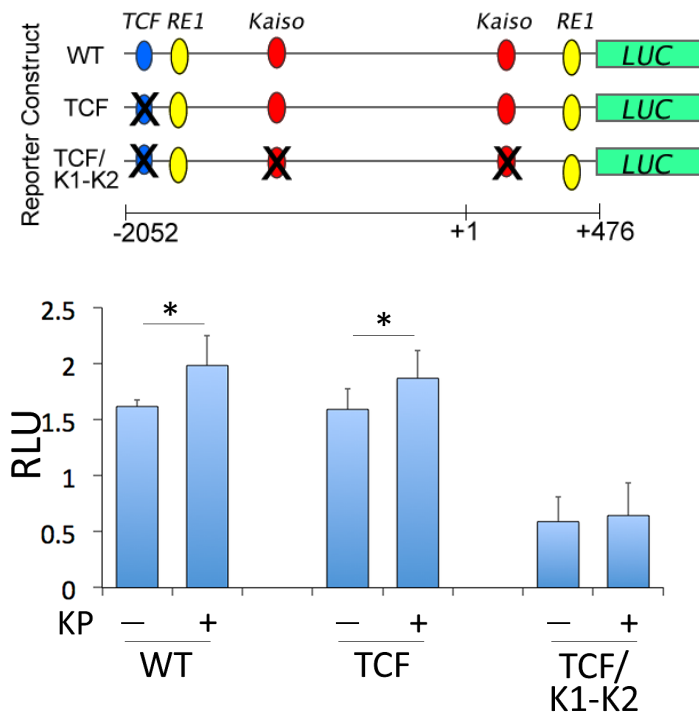

**Fig. S5B. Relevance of TCF DNA binding site on regulation of *Kcc2*-LUC activity by Kenpaullone**

N2a differentiated cells were used, as in Fig. 5B.

Top panel: mouse *Kcc2* promoter constructs.

Bottom panel, bar diagrams: KP significantly increased *Kcc2* promoter activity, compared to vehicle, when TCF binding site was deleted and in WT. Of note, non-stimulated TCF deletion construct not different from WT, indicating an overall minor influence of TCF- $\beta$ -cat binding on *Kcc2* promoter activity.

However, triple-deletion of TCF and both Kaiso sites rendered the *Kcc2* promoter very low in activity, compared with WT (without KP), at  $<1/3$  of its activity, which is less than the  $\Delta\Delta$ Kaiso1,2 deletion construct (Fig. 5B;  $<1/2$ ). Of note, the triple-deletion construct was completely non-responsive to KP.

4 independent cultures, \*  $p < 0.05$  KP-treated vs vehicle, t-test.

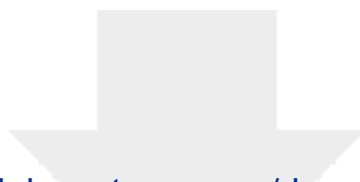

Click here to access/download

**Supplemental Videos and Spreadsheets**  
**SupplFileS1.xlsx**

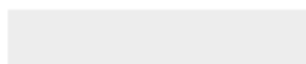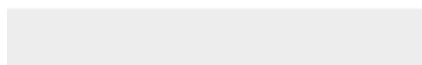



Click here to access/download

**Supplemental Videos and Spreadsheets**  
**SupplFileS2.xlsx**



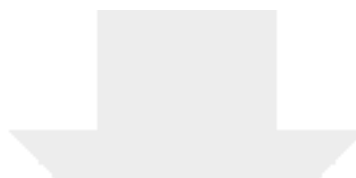

Click here to access/download

**Supplemental Videos and Spreadsheets**  
**SupplFileS3.xlsx**

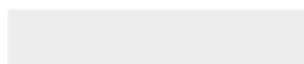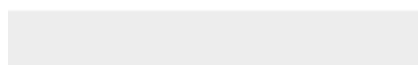

Source: https://biorxiv.org/content/biorxiv/early/2019/09/12/767681.full-text.pdf
